# Supplementary material for: Genome wide analysis of 3′ UTR sequence elements and proteins regulating mRNA stability during maternal-to-zygotic transition in zebrafish
Source: HighWire-hosted journal article supplement (doi:10.1101/gr.245159.118), 2019-06-21
Supplement: Supplemental_Table_S1_JDedit.xlsx [file Supplemental_Table_S1_JDedit.xlsx]

## Sheet: Sheet1
Supplemental Table S1. High-throughput sequencing summary statistics. Number of reads sequenced and mapped are indicated per replicate together with SRA IDs.
sample	age	dev_stage	treatment	selection	reads	uniquely_mapped_reads	multi_mapped_reads	publication_ref	run_sra_refs	internal_sample_ref	internal_replicate_ref	internal_replicate_order	internal_run_refs
Developmental timecourse - WT 1c pA B1	0.2	1-cell		pA	11703500	10924693	362155		SRR8788648	AGS000570	AGN000636	1	AGR000828
Developmental timecourse - WT 1c pA B2	0.2	1-cell		pA	15312312	14090060	474970		SRR8788649	AGS000570	AGN000637	2	AGR000829
Developmental timecourse - WT 2c pA B1	0.75	2-cell		pA	13853490	12856008	439369		SRR8788646	AGS000571	AGN000638	1	AGR000830
Developmental timecourse - WT 2c pA B2	0.75	2-cell		pA	12759523	11843946	417506		SRR8788647	AGS000571	AGN000639	2	AGR000831
Developmental timecourse - WT 4c pA B1	1	4-cell		pA	12763070	11760205	413714		SRR8788644	AGS000572	AGN000640	1	AGR000832
Developmental timecourse - WT 4c pA B2	1	4-cell		pA	14337178	13390611	454698		SRR8788645	AGS000572	AGN000641	2	AGR000833
Developmental timecourse - WT 16c pA B1	1.5	16-cell		pA	14592526	13564190	454308		SRR8788642	AGS000573	AGN000642	1	AGR000834
Developmental timecourse - WT 16c pA B2	1.5	16-cell		pA	15324322	14358285	482418		SRR8788643	AGS000573	AGN000643	2	AGR000835
Developmental timecourse - WT 256c pA B1	2.5	256-cell		pA	15747480	14729088	502194		SRR8788652	AGS000575	AGN000646	1	AGR000838
Developmental timecourse - WT 256c pA B2	2.5	256-cell		pA	15388474	14442050	477103		SRR8788653	AGS000575	AGN000647	2	AGR000839
Developmental timecourse - WT 1Kc pA B1	3	1k-cell		pA	17124225	15866700	538966		SRR8788668	AGS000576	AGN000648	1	AGR000840
Developmental timecourse - WT 1Kc pA B2	3	1k-cell		pA	17232832	16156460	530259		SRR8788669	AGS000576	AGN000649	2	AGR000841
Developmental timecourse - WT oblong pA B1	3.7	oblong		pA	14831171	13712070	561742		SRR8788666	AGS000577	AGN000650	1	AGR000842
Developmental timecourse - WT oblong pA B2	3.7	oblong		pA	14434341	13434061	542299		SRR8788667	AGS000577	AGN000651	2	AGR000843
Developmental timecourse - WT dome pA B1	4.3	dome		pA	16760725	15176275	962231		SRR8788664	AGS000579	AGN000654	1	AGR000846
Developmental timecourse - WT dome pA B2	4.3	dome		pA	15321215	13858466	872095		SRR8788665	AGS000579	AGN000655	2	AGR000847
Developmental timecourse - WT 50%epi pA B1	5.3	50%-epiboly		pA	17495189	15694998	1059288		SRR8788662	AGS000580	AGN000656	1	AGR000848
Developmental timecourse - WT 50%epi pA B2	5.3	50%-epiboly		pA	15404523	13942576	914360		SRR8788663	AGS000580	AGN000657	2	AGR000849
Developmental timecourse - WT 75%epi pA B1	8	75%-epiboly		pA	17704991	15635187	1283945		SRR8788660	AGS000582	AGN000660	1	AGR000852
Developmental timecourse - WT 75%epi pA B2	8	75%-epiboly		pA	18235969	16330169	1170207		SRR8788661	AGS000582	AGN000661	2	AGR000853
Developmental timecourse - WT 1c R0 B1	0.2	1-cell		r0	15378612	13205467	925454		SRR8788633	AGS000583	AGN000662	1	AGR000854
Developmental timecourse - WT 1c R0 B2	0.2	1-cell		r0	16023476	13303555	1038993		SRR8788632	AGS000583	AGN000663	2	AGR000855
Developmental timecourse - WT 2c R0 B1	0.75	2-cell		r0	27745053	18620802	2144381		SRR8788631,SRR8788630	AGS000584	AGN000664	1	AGR000856,AGR000857
Developmental timecourse - WT 2c R0 B2	0.75	2-cell		r0	24291433	16808350	1565623		SRR8788629,SRR8788628	AGS000584	AGN000665	2	AGR000858,AGR000859
Developmental timecourse - WT 4c R0 B1	1	4-cell		r0	30087458	23225958	2075143		SRR8788627,SRR8788626	AGS000585	AGN000666	1	AGR000860,AGR000861
Developmental timecourse - WT 4c R0 B2	1	4-cell		r0	14327192	11844515	910882		SRR8788636	AGS000585	AGN000667	2	AGR000862
Developmental timecourse - WT 16c R0 B1	1.5	16-cell		r0	21183604	15885842	1311661		SRR8788635,SRR8788670	AGS000586	AGN000668	1	AGR000863,AGR000864
Developmental timecourse - WT 16c R0 B2	1.5	16-cell		r0	21506726	15864564	1684260		SRR8788671,SRR8788672	AGS000586	AGN000669	2	AGR000866,AGR000865
Developmental timecourse - WT 256c R0 B1	2.5	256-cell		r0	14805399	12369883	1023577		SRR8788673	AGS000588	AGN000672	1	AGR000870
Developmental timecourse - WT 256c R0 B2	2.5	256-cell		r0	24378547	18753152	1823322		SRR8788674,SRR8788675	AGS000588	AGN000673	2	AGR000871,AGR000872
Developmental timecourse - WT oblong R0 B1	3.7	oblong		r0	19315515	15055419	1800257		SRR8788676,SRR8788677	AGS000590	AGN000676	1	AGR000876,AGR000877
Developmental timecourse - WT oblong R0 B2	3.7	oblong		r0	10431620	8437087	1035513		SRR8788678	AGS000590	AGN000677	2	AGR000878
Developmental timecourse - WT sphere R0 B1	4	sphere		r0	31865918	24310596	3018677		SRR8788679,SRR8788694	AGS000591	AGN000678	1	AGR000879,AGR000880
Developmental timecourse - WT sphere R0 B2	4	sphere		r0	28900284	21847574	2841621		SRR8788693,SRR8788696	AGS000591	AGN000679	2	AGR000881,AGR000882
Developmental timecourse - WT dome R0 B1	4.3	dome		r0	28556972	21539583	2879009		SRR8788695,SRR8788698	AGS000592	AGN000680	1	AGR000884,AGR000883
Developmental timecourse - WT dome R0 B2	4.3	dome		r0	36920598	27698876	3841354		SRR8788697,SRR8788700	AGS000592	AGN000681	2	AGR000885,AGR000886
Developmental timecourse - WT 50%epi R0 B1	5.3	50%-epiboly		r0	30573594	23276286	3048155		SRR8788699,SRR8788702	AGS000593	AGN000682	1	AGR000887,AGR000888
Developmental timecourse - WT 50%epi R0 B2	5.3	50%-epiboly		r0	8713222	7017940	913649		SRR8788701	AGS000593	AGN000683	2	AGR000889
Developmental timecourse - WT 75%epi R0 B1	8	75%-epiboly		r0	43173438	26548275	4371786		SRR8788656,SRR8788657,SRR8788654	AGS000595	AGN000686	1	AGR000893,AGR000894,AGR000895
Developmental timecourse - WT 75%epi R0 B2	8	75%-epiboly		r0	17088760	11408581	1737357		SRR8788655,SRR8788688	AGS000595	AGN000687	2	AGR000896,AGR000897
Developmental timecourse - WT a-Am 1c pA B1	0.2	1-cell	alpha-am	pA	16185928	14700987	504002		SRR8788680	AGS000596	AGN000688	1	AGR000900
Developmental timecourse - WT a-Am 1c pA B2	0.2	1-cell	alpha-am	pA	17779821	16274119	546058		SRR8788658	AGS000596	AGN000689	2	AGR000901
Developmental timecourse - WT a-Am 16c pA B1	1.5	16-cell	alpha-am	pA	17694147	16271266	537916		SRR8788659	AGS000597	AGN000690	1	AGR000902
Developmental timecourse - WT a-Am 16c pA B2	1.5	16-cell	alpha-am	pA	16218234	14981549	492999		SRR8788686	AGS000597	AGN000691	2	AGR000903
Developmental timecourse - WT a-Am 256c pA B1	2.5	256-cell	alpha-am	pA	18672043	17461561	556688		SRR8788689	AGS000599	AGN000694	1	AGR000906
Developmental timecourse - WT a-Am 256c pA B2	2.5	256-cell	alpha-am	pA	18929947	17681444	566465		SRR8788704	AGS000599	AGN000695	2	AGR000907
Developmental timecourse - WT a-Am 1Kc pA B1	3	1k-cell	alpha-am	pA	21217667	19732871	658063		SRR8788703	AGS000600	AGN000696	1	AGR000908
Developmental timecourse - WT a-Am 1Kc pA B2	3	1k-cell	alpha-am	pA	16067842	14893451	488447		SRR8788683	AGS000600	AGN000697	2	AGR000909
Developmental timecourse - WT a-Am 75%epi pA B1	8	75%-epiboly	alpha-am	pA	16503715	14974014	736809		SRR8788681	AGS000603	AGN000702	1	AGR000914
Developmental timecourse - WT a-Am 75%epi pA B2	8	75%-epiboly	alpha-am	pA	13915552	12190644	690483		SRR8788708	AGS000603	AGN000703	2	AGR000915
Developmental timecourse - WT a-Am 1c R0 B1	0.2	1-cell	alpha-am	r0	34440616	18794892	1964147		SRR8788707,SRR8788706	AGS000604	AGN000704	1	AGR000916,AGR000917
Developmental timecourse - WT a-Am 1c R0 B2	0.2	1-cell	alpha-am	r0	43772170	25284366	2422033		SRR8788705,SRR8788682	AGS000604	AGN000705	2	AGR000918,AGR000919
Developmental timecourse - WT a-Am 16c R0 B1	1.5	16-cell	alpha-am	r0	53163382	27142161	3038489		SRR8788691,SRR8788692,SRR8788641,SRR8788651	AGS000605	AGN000706	1	AGR000922,AGR000923,AGR000924,AGR000925
Developmental timecourse - WT a-Am 16c R0 B2	1.5	16-cell	alpha-am	r0	19747066	10263710	864881		SRR8788685,SRR8788634	AGS000605	AGN000707	2	AGR000926,AGR000927
Developmental timecourse - WT a-Am 64c R0 B1	2	64-cell	alpha-am	r0	42445511	17986359	2035200		SRR8788650,SRR8788684,SRR8788690	AGS000606	AGN000708	1	AGR000929,AGR000930,AGR000931
Developmental timecourse - WT a-Am 64c R0 B2	2	64-cell	alpha-am	r0	62563750	32570331	3262024		SRR8788687,SRR8788637	AGS000606	AGN000709	2	AGR000932,AGR000933
Developmental timecourse - WT TinyLNA430 64c pA	2	64-cell	tinyLNA_miR-430	pA	14971888	13157800	453757		SRR8788639	AGS000616	AGN000725	1	AGR000969
Developmental timecourse - WT TinyLNA430 1Kc pA	3	1k-cell	tinyLNA_miR-430	pA	16589683	15387655	566451		SRR8788638	AGS000617	AGN000726	1	AGR000970
Developmental timecourse - WT TinyLNA430 shield pA	6	shield	tinyLNA_miR-430	pA	17687091	15792503	1025176		SRR8788640	AGS000618	AGN000727	1	AGR000971
Developmental timecourse - WT 64c pA B1	2	64-cell		pA	16170667	15166801	500874	Beaudoin, Novoa et al. NSMB 2018	SRR5893044	AGS000574	AGN000644	1	AGR000836
Developmental timecourse - WT 64c pA B2	2	64-cell		pA	17393340	16360171	552859	Beaudoin, Novoa et al. NSMB 2018	SRR5893045	AGS000574	AGN000645	2	AGR000837
Developmental timecourse - WT sphere pA B1	4	sphere		pA	14801411	13657724	663424	Beaudoin, Novoa et al. NSMB 2018	SRR5893046	AGS000578	AGN000652	1	AGR000844
Developmental timecourse - WT sphere pA B2	4	sphere		pA	15962885	14740108	708009	Beaudoin, Novoa et al. NSMB 2018	SRR5893047	AGS000578	AGN000653	2	AGR000845
Developmental timecourse - WT shield pA B1	6	shield		pA	15583945	13331807	924635	Beaudoin, Novoa et al. NSMB 2018	SRR5893048	AGS000581	AGN000658	1	AGR000850
Developmental timecourse - WT shield pA B2	6	shield		pA	13413234	12143897	813651	Beaudoin, Novoa et al. NSMB 2018	SRR5893049	AGS000581	AGN000659	2	AGR000851
Developmental timecourse - WT 64c R0 B1	2	64-cell		r0	17711949	14125608	1557696	Beaudoin, Novoa et al. NSMB 2018	SRR5893050	AGS000587	AGN000670	1	AGR000867
Developmental timecourse - WT 64c R0 B2	2	64-cell		r0	31658039	23036939	2327226	Beaudoin, Novoa et al. NSMB 2018	SRR5893051,SRR5893042	AGS000587	AGN000671	2	AGR000868,AGR000869
Developmental timecourse - WT 1Kc R0 B1	3	1k-cell		r0	18278646	15253167	1241542	Beaudoin, Novoa et al. NSMB 2018	SRR5893043	AGS000589	AGN000674	1	AGR000873
Developmental timecourse - WT 1Kc R0 B2	3	1k-cell		r0	31715543	23776076	2455105	Beaudoin, Novoa et al. NSMB 2018	SRR5893168,SRR5893167	AGS000589	AGN000675	2	AGR000875,AGR000874
Developmental timecourse - WT shield R0 B1	6	shield		r0	14648020	11726231	1488593	Beaudoin, Novoa et al. NSMB 2018	SRR5893169	AGS000594	AGN000684	1	AGR000890
Developmental timecourse - WT shield R0 B2	6	shield		r0	26163283	20624940	2591491	Beaudoin, Novoa et al. NSMB 2018	SRR5893163,SRR5893170	AGS000594	AGN000685	2	AGR000892,AGR000891
Developmental timecourse - WT a-Am 64c pA B1	2	64-cell	alpha-am	pA	11642714	10611315	351069	Beaudoin, Novoa et al. NSMB 2018	SRR5893164	AGS000598	AGN000692	1	AGR000904
Developmental timecourse - WT a-Am 64c pA B2	2	64-cell	alpha-am	pA	15999675	14811567	478476	Beaudoin, Novoa et al. NSMB 2018	SRR5893165	AGS000598	AGN000693	2	AGR000905
Developmental timecourse - WT a-Am sphere pA B1	4	sphere	alpha-am	pA	20266392	18706250	682931	Beaudoin, Novoa et al. NSMB 2018	SRR5893166	AGS000601	AGN000698	1	AGR000910
Developmental timecourse - WT a-Am sphere pA B2	4	sphere	alpha-am	pA	20184761	18610901	686271	Beaudoin, Novoa et al. NSMB 2018	SRR5893161	AGS000601	AGN000699	2	AGR000911
Developmental timecourse - WT a-Am shield pA B1	6	shield	alpha-am	pA	14975650	13569167	621857	Beaudoin, Novoa et al. NSMB 2018	SRR5893162	AGS000602	AGN000700	1	AGR000912
Developmental timecourse - WT a-Am shield pA B2	6	shield	alpha-am	pA	17180197	15524386	702224	Beaudoin, Novoa et al. NSMB 2018	SRR5893065	AGS000602	AGN000701	2	AGR000913
Developmental timecourse - WT a-Am 256c R0 B1	2.5	256-cell	alpha-am	r0	32768026	17649659	1803443	Bazzini et al. EMBO 2016	SRR3420308,SRR3420304	AGS000607	AGN000710	1	AGR000937,AGR000936
Developmental timecourse - WT a-Am 256c R0 B2	2.5	256-cell	alpha-am	r0	32972395	17774219	1660553	Bazzini et al. EMBO 2016	SRR3420383,SRR3420379	AGS000607	AGN000711	2	AGR000939,AGR000938
Developmental timecourse - WT a-Am 1Kc R0 B1	3	1k-cell	alpha-am	r0	24277697	13483641	1700364	Bazzini et al. EMBO 2016	SRR3420375,SRR3420369	AGS000608	AGN000712	1	AGR000943,AGR000942
Developmental timecourse - WT a-Am 1Kc R0 B2	3	1k-cell	alpha-am	r0	33806976	17756087	2513499	Bazzini et al. EMBO 2016	SRR3420359,SRR3420362	AGS000608	AGN000713	2	AGR000944,AGR000945
Developmental timecourse - WT a-Am sphere R0 B1	4	sphere	alpha-am	r0	27757201	15144093	2747996	Bazzini et al. EMBO 2016	SRR3420349,SRR3420346	AGS000609	AGN000714	1	AGR000949,AGR000948
Developmental timecourse - WT a-Am sphere R0 B2	4	sphere	alpha-am	r0	55713343	27718161	3718739	Bazzini et al. EMBO 2016	SRR3420337,SRR3420341,SRR3420333	AGS000609	AGN000715	2	AGR000952,AGR000953,AGR000951
Developmental timecourse - WT a-Am shield R0 B1	6	shield	alpha-am	r0	53839818	33989286	5923632	Bazzini et al. EMBO 2016	SRR3420319,SRR3420323,SRR3420327,SRR3420315	AGS000610	AGN000716	1	AGR000956,AGR000957,AGR000958,AGR000955
Developmental timecourse - WT a-Am shield R0 B2	6	shield	alpha-am	r0	46485181	29419906	4645675	Bazzini et al. EMBO 2016	SRR3420398,SRR3420402,SRR3420409,SRR3420405	AGS000610	AGN000717	2	AGR000959,AGR000960,AGR000962,AGR000961
Developmental timecourse - WT a-Am 75%epi R0 B1	8	75%-epiboly	alpha-am	r0	36176653	22528720	4027789	Bazzini et al. EMBO 2016	SRR3420392,SRR3420388	AGS000638	AGN000718	1	AGR001011,AGR001010
Developmental timecourse - WT a-Am 75%epi R0 B2	8	75%-epiboly	alpha-am	r0	53690142	34603643	6168539	Bazzini et al. EMBO 2016	SRR3420419,SRR3420420,SRR3420421	AGS000638	AGN000719	2	AGR001012,AGR001013,AGR001014
Developmental timecourse - WT TinyLNA430 64c R0 B1	2	64-cell	tinyLNA_miR-430	r0	38705025	17127551	1934085	Beaudoin, Novoa et al. NSMB 2018	SRR5893067,SRR5893064	AGS000639	AGN000728	1	AGR001018,AGR001017
Developmental timecourse - WT TinyLNA430 1Kc R0 B1	3	1k-cell	tinyLNA_miR-430	r0	27655286	15044418	2273155	Beaudoin, Novoa et al. NSMB 2018	SRR5893066,SRR5893069	AGS000640	AGN000729	1	AGR001020,AGR001021
Developmental timecourse - WT TinyLNA430 shield R0 B1	6	shield	tinyLNA_miR-430	r0	39004825	23897877	3921603	Beaudoin, Novoa et al. NSMB 2018	SRR5893068,SRR5893070,SRR5893071	AGS000619	AGN000730	1	AGR000972,AGR000974,AGR000973
RESA - WT 32c DL B1	2	32-cell	transcriptome_6h_aAm_AGN000129_injection		62940304	52348215	8081142		SRR8784159,SRR8784160,SRR8784161	AGS000442	AGN000461	1	AGR000582,AGR000583,AGR000581
RESA - WT 32c DL B2	2	32-cell	transcriptome_6h_aAm_AGN000129_injection		111180602	92721823	14043361		SRR8784162,SRR8784155	AGS000442	AGN000462	2	AGR000584,AGR000585
RESA - WT 6h DL B1	6	shield	transcriptome_6h_aAm_AGN000129_injection		88199748	73411036	11011446		SRR8784156,SRR8784157	AGS000443	AGN000463	1	AGR000586,AGR000587
RESA - WT 6h DL B2	6	shield	transcriptome_6h_aAm_AGN000129_injection		46088710	38313004	5753479		SRR8784158,SRR8784153,SRR8784154,SRR8784173	AGS000443	AGN000464	2	AGR000588,AGR000589,AGR000590,AGR000591
RESA - WT a-Am 6h DL B1	6		transcriptome_6h_aAm_AGN000129_injection,alpha-am		72562135	60416029	9182059		SRR8784174,SRR8784175,SRR8784176	AGS000444	AGN000465	1	AGR000593,AGR000594,AGR000592
RESA - WT a-Am 6h DL B2	6		transcriptome_6h_aAm_AGN000129_injection,alpha-am		60423253	50482806	7442760		SRR8784177,SRR8784178,SRR8784179,SRR8784180,SRR8784165	AGS000444	AGN000466	2	AGR000595,AGR000596,AGR000597,AGR000598,AGR000599
RESA - WT TinyLNA430 6h DL B1	6		transcriptome_6h_aAm_AGN000129_injection,tinyLNA_miR-430		81492602	67917696	10216646		SRR8784166,SRR8784148	AGS000445	AGN000467	1	AGR000600,AGR000601
RESA - WT TinyLNA430 6h DL B2	6		transcriptome_6h_aAm_AGN000129_injection,tinyLNA_miR-430		73283286	61157215	9108501		SRR8784147,SRR8784150	AGS000445	AGN000468	2	AGR000602,AGR000603
RESA - WT 6h r2 B1	6	shield	500utr		6382537	5339147	120794		SRR8784149	AGS000532	AGN000582	1	AGR000768
RESA - WT 6h r2 B2	6	shield	500utr		6066803	5058488	112036		SRR8784144,SRR8784143	AGS000532	AGN000587	2	AGR000769,AGR000770
RESA - WT 6h r2 B3	6	shield	500utr		5644030	4727872	106442		SRR8784146	AGS000532	AGN000591	3	AGR000771
RESA - WT 6h a-Am r2 B1	6		500utr,alpha-am		5645054	4742419	104903		SRR8784145	AGS000533	AGN000583	1	AGR000772
RESA - WT 6h a-Am r2 B2	6		500utr,alpha-am		9721647	8163876	183333		SRR8784152,SRR8784151	AGS000533	AGN000588	2	AGR000773,AGR000774
RESA - WT 6h a-Am r2 B3	6		500utr,alpha-am		7266743	6106009	136902		SRR8784171	AGS000533	AGN000592	3	AGR000775
RESA - WT 6h L430 r2 B1	6		500utr,tinyLNA_miR-430		4152085	3466219	77508		SRR8784172	AGS000534	AGN000584	1	AGR000776
RESA - WT 6h L430 r2 B2	6		500utr,tinyLNA_miR-430		4799609	4035975	88762		SRR8784169,SRR8784170	AGS000534	AGN000589	2	AGR000777,AGR000778
RESA - WT 6h L430 r2 B3	6		500utr,tinyLNA_miR-430		5850255	4910952	107818		SRR8784167	AGS000534	AGN000593	3	AGR000779
RESA - WT 32c r2 B1	2	32-cell	500utr		11064231	9250415	213495		SRR8784168	AGS000535	AGN000585	1	AGR000780
RESA - WT 32c r2 B2	2	32-cell	500utr		22850452	19102811	456527		SRR8784181,SRR8784182	AGS000535	AGN000586	2	AGR000781,AGR000782
RESA - WT 32c r2 B3	2	32-cell	500utr		10643799	8897404	208575		SRR8784163	AGS000535	AGN000590	3	AGR000783
RESA - WT 8h a-Am pA r3 B1	8	75%-epiboly	500utr,alpha-am	pA	7180185	6080573	129962		SRR8784164	AGS000941	AGN001062	1	AGR001457
RESA - WT 8h a-Am pA r3 B2	8	75%-epiboly	500utr,alpha-am	pA	4790485	4058864	87665		SRR8784184	AGS000941	AGN001063	2	AGR001458
RESA - WT 8h a-Am pA r3 B3	8	75%-epiboly	500utr,alpha-am	pA	9645363	8185712	175673		SRR8784183	AGS000941	AGN001064	3	AGR001459
RESA - WT 64c pA r3 B1	2	64-cell	500utr	pA	3494047	2953180	64601	Yartseva, Takacs et al. Nature Methods 2017	SRR4375094	AGS000940	AGN001060	1	AGR001455
RESA - WT 64c pA r3 B2	2	64-cell	500utr	pA	4766081	4036982	87776	Yartseva, Takacs et al. Nature Methods 2017	SRR4375176	AGS000940	AGN001061	2	AGR001456
RESA - WT 8h L430 pA r3 B1	8	75%-epiboly	500utr,tinyLNA_miR-430	pA	9489219	8041001	168630	Yartseva, Takacs et al. Nature Methods 2017	SRR4375301	AGS000942	AGN001065	1	AGR001460
RESA - WT 8h L430 pA r3 B2	8	75%-epiboly	500utr,tinyLNA_miR-430	pA	8640935	7348477	151653	Yartseva, Takacs et al. Nature Methods 2017	SRR4375302	AGS000942	AGN001066	2	AGR001461
RESA - WT 8h L430 pA r3 B3	8	75%-epiboly	500utr,tinyLNA_miR-430	pA	11840412	10057437	209241	Yartseva, Takacs et al. Nature Methods 2017	SRR4375303	AGS000942	AGN001067	3	AGR001462
RESA - WT 8h pA r3 B1	8	75%-epiboly	500utr	pA	5895953	4995171	104641	Yartseva, Takacs et al. Nature Methods 2017	SRR4375304	AGS000943	AGN001068	1	AGR001463
RESA - WT 8h pA r3 B2	8	75%-epiboly	500utr	pA	8845108	7507785	157696	Yartseva, Takacs et al. Nature Methods 2017	SRR4375305	AGS000943	AGN001069	2	AGR001464
RESA - WT 8h pA r3 B3	8	75%-epiboly	500utr	pA	3958477	3354411	68944	Yartseva, Takacs et al. Nature Methods 2017	SRR4375306	AGS000943	AGN001070	3	AGR001465
iCLIP zff9 B1	4	sphere	iCLIP	FLAG_antibody	132789108	41052513	32554376		SRR8787802,SRR8787796	AGS001023	AGN001179	1	AGR001615,AGR001616
iCLIP zff9 B2	4	sphere	iCLIP	FLAG_antibody	172236808	34096903	36578095		SRR8787805,SRR8787678	AGS001023	AGN001333	2	AGR001618,AGR001617
iCLIP zff9 B3	4	sphere	iCLIP	FLAG_antibody	9455306	2187643	1887477		SRR8787611,SRR8787706	AGS001023	AGN001334	3	AGR001619,AGR001620
iCLIP zff9 B4	4	sphere	iCLIP	FLAG_antibody	17796076	2989494	2997580		SRR8787650,SRR8787731	AGS001023	AGN001335	4	AGR001621,AGR001622
iCLIP org B1	4	sphere	iCLIP	FLAG_antibody	14210253	2924908	3917113		SRR8787623,SRR8787621	AGS001024	AGN001180	1	AGR001623,AGR001624
iCLIP srsf4 B1	4	sphere	iCLIP	FLAG_antibody	1736010	405055	323831		SRR8787580,SRR8787579	AGS001025	AGN001181	1	AGR001625,AGR001626
iCLIP hnrnpa0a B1	4	sphere	iCLIP	FLAG_antibody	54925697	26630672	14027671		SRR8787578,SRR8787577	AGS001026	AGN001182	1	AGR001627,AGR001628
iCLIP hnrnpa0a B2	4	sphere	iCLIP	FLAG_antibody	114052037	23452276	21524984		SRR8787584,SRR8787583	AGS001026	AGN001312	2	AGR001629,AGR001630
iCLIP hnrnpa0a B3	4	sphere	iCLIP	FLAG_antibody	48183557	13094292	7321317		SRR8787582,SRR8787581	AGS001026	AGN001313	3	AGR001632,AGR001631
iCLIP hnrnpa0a B4	4	sphere	iCLIP	FLAG_antibody	42132001	6964893	5349956		SRR8787576,SRR8787575	AGS001026	AGN001314	4	AGR001633,AGR001634
iCLIP pcbp2 B1	4	sphere	iCLIP	FLAG_antibody	144523452	31596707	29068905		SRR8787626,SRR8787627	AGS001027	AGN001183	1	AGR001635,AGR001636
iCLIP pcbp2 B2	4	sphere	iCLIP	FLAG_antibody	26594665	7489937	4947959		SRR8787624,SRR8787625	AGS001027	AGN001330	2	AGR001637,AGR001638
iCLIP pcbp2 B3	4	sphere	iCLIP	FLAG_antibody	74586853	16437117	16079729		SRR8787630,SRR8787729	AGS001027	AGN001331	3	AGR001639,AGR001640
iCLIP pcbp2 B4	4	sphere	iCLIP	FLAG_antibody	54619073	22824471	12341710		SRR8787628,SRR8787629	AGS001027	AGN001332	4	AGR001641,AGR001642
iCLIP cth1 B1	4	sphere	iCLIP	FLAG_antibody	4671914	1081306	1314447		SRR8787632,SRR8787633	AGS001028	AGN001184	1	AGR001643,AGR001644
iCLIP hnrnpc B1	4	sphere	iCLIP	FLAG_antibody	6841194	2239454	1514994		SRR8787793,SRR8787792	AGS001029	AGN001185	1	AGR001645,AGR001646
iCLIP hnrnpc B2	4	sphere	iCLIP	FLAG_antibody	77325322	29220810	16692143		SRR8787795,SRR8787794	AGS001029	AGN001321	2	AGR001647,AGR001648
iCLIP hnrnpc B3	4	sphere	iCLIP	FLAG_antibody	25792311	10326943	4737876		SRR8787797,SRR8787574	AGS001029	AGN001322	3	AGR001649,AGR001650
iCLIP hnrnpc B4	4	sphere	iCLIP	FLAG_antibody	74002624	26755511	10916507		SRR8787799,SRR8787798	AGS001029	AGN001323	4	AGR001651,AGR001652
iCLIP hrnpd B1	4	sphere	iCLIP	FLAG_antibody	2932350	1051714	834975		SRR8787801,SRR8787800	AGS001030	AGN001186	1	AGR001653,AGR001654
iCLIP hrnpd B2	4	sphere	iCLIP	FLAG_antibody	27992734	14062062	5431365		SRR8787601,SRR8787652	AGS001030	AGN001324	2	AGR001655,AGR001656
iCLIP hrnpd B3	4	sphere	iCLIP	FLAG_antibody	114342522	31641828	23209028		SRR8787596,SRR8787780	AGS001030	AGN001325	3	AGR001657,AGR001658
iCLIP hrnpd B4	4	sphere	iCLIP	FLAG_antibody	53241009	23941701	9989499		SRR8787644,SRR8787647	AGS001030	AGN001326	4	AGR001659,AGR001660
iCLIP hug B1	4	sphere	iCLIP	FLAG_antibody	31564525	13887277	10325112		SRR8787649,SRR8787651,SRR8787665	AGS001031	AGN001187	1	AGR001661,AGR001662,AGR001663
iCLIP hug B3	4	sphere	iCLIP	FLAG_antibody	37359387	7339082	3444853		SRR8787734,SRR8787695	AGS001031	AGN001328	3	AGR001667,AGR001666
iCLIP hug B4	4	sphere	iCLIP	FLAG_antibody	143356787	11376949	6146376		SRR8787680,SRR8787733	AGS001031	AGN001329	4	AGR001668,AGR001669
iCLIP hnrnpab B2	4	sphere	iCLIP	FLAG_antibody	36285583	8311740	6835914		SRR8787653,SRR8787789	AGS001032	AGN001318	2	AGR001673,AGR001674
iCLIP hnrnpab B3	4	sphere	iCLIP	FLAG_antibody	58468147	28514029	14616683		SRR8787622,SRR8787692	AGS001032	AGN001319	3	AGR001675,AGR001676
iCLIP hnrnpab B4	4	sphere	iCLIP	FLAG_antibody	102346290	26591109	22413812		SRR8787790,SRR8787679	AGS001032	AGN001320	4	AGR001677,AGR001678
iCLIP hnrnpa1 B1	4	sphere	iCLIP	FLAG_antibody	18532268	5730901	5328042		SRR8787732,SRR8787763,SRR8787764	AGS001033	AGN001189	1	AGR001679,AGR001680,AGR001681
iCLIP hnrnpa1 B2	4	sphere	iCLIP	FLAG_antibody	2708104	1012400	849526		SRR8787761,SRR8787762,SRR8787791	AGS001033	AGN001190	2	AGR001682,AGR001683,AGR001684
iCLIP hnrnpa1 B3	4	sphere	iCLIP	FLAG_antibody	84295100	19798353	13256013		SRR8787760,SRR8787757	AGS001033	AGN001315	3	AGR001685,AGR001686
iCLIP hnrnpa1 B4	4	sphere	iCLIP	FLAG_antibody	8578068	2685574	1482655		SRR8787758,SRR8787755	AGS001033	AGN001316	4	AGR001687,AGR001688
iCLIP hnrnpa1 B5	4	sphere	iCLIP	FLAG_antibody	115271689	36114134	18158353		SRR8787756,SRR8787728	AGS001033	AGN001317	5	AGR001690,AGR001689
iCLIP khdrbs1b B1	4	sphere	iCLIP	FLAG_antibody	25382551	6786338	7727594		SRR8787727,SRR8787730,SRR8787595	AGS001034	AGN001191	1	AGR001691,AGR001692,AGR001693
iCLIP khdrbs1b B2	4	sphere	iCLIP	FLAG_antibody	10460897	2550288	2198719		SRR8787724,SRR8787723,SRR8787726	AGS001034	AGN001193	2	AGR001694,AGR001695,AGR001696
iCLIP khdrbs1b B3	4	sphere	iCLIP	FLAG_antibody	3757684	1422265	1325920		SRR8787725,SRR8787722	AGS001034	AGN001417	3	AGR001697,AGR001698
iCLIP khdrbs1b B4	4	sphere	iCLIP	FLAG_antibody	1644213	630383	520525		SRR8787721,SRR8787603	AGS001034	AGN001418	4	AGR001699,AGR001700
iCLIP khdrbs1a B1	4	sphere	iCLIP	FLAG_antibody	108283356	26858456	37855432		SRR8787694,SRR8787605,SRR8787606	AGS001035	AGN001192	1	AGR001703,AGR001704,AGR001705
iCLIP khdrbs1a B2	4	sphere	iCLIP	FLAG_antibody	11271098	1013907	1333762		SRR8787599,SRR8787600	AGS001035	AGN001463	2	AGR001706,AGR001707
iCLIP khdrbs1a B3	4	sphere	iCLIP	FLAG_antibody	12811238	944246	2077216		SRR8787664,SRR8787602	AGS001035	AGN001464	3	AGR001708,AGR001709
iCLIP khdrbs1a B4	4	sphere	iCLIP	FLAG_antibody	30839904	2182581	1972285		SRR8787597,SRR8787598	AGS001035	AGN001465	4	AGR001711,AGR001710
iCLIP rbm4.2 B1	4	sphere	iCLIP	FLAG_antibody	7662222	1919634	2307453		SRR8787737,SRR8787736,SRR8787735	AGS001036	AGN001194	1	AGR001712,AGR001713,AGR001714
iCLIP rbm4.2 B2	4	sphere	iCLIP	FLAG_antibody	1288253	410711	464686		SRR8787612,SRR8787741	AGS001036	AGN001423	2	AGR001715,AGR001716
iCLIP rbm4.2 B3	4	sphere	iCLIP	FLAG_antibody	8683696	2802418	3528928		SRR8787740,SRR8787739	AGS001036	AGN001424	3	AGR001717,AGR001718
iCLIP rbm4.2 B4	4	sphere	iCLIP	FLAG_antibody	4657378	1225395	1534618		SRR8787738,SRR8787743	AGS001036	AGN001425	4	AGR001719,AGR001720
iCLIP tia1 B1	4	sphere	iCLIP	FLAG_antibody	1089038	297663	277257		SRR8787742,SRR8787783	AGS001037	AGN001195	1	AGR001721,AGR001722
iCLIP tia1 B2	4	sphere	iCLIP	FLAG_antibody	26833754	7446679	5536245		SRR8787784,SRR8787781	AGS001037	AGN001457	2	AGR001723,AGR001724
iCLIP tia1 B3	4	sphere	iCLIP	FLAG_antibody	29992396	7604612	5088098		SRR8787782,SRR8787787	AGS001037	AGN001458	3	AGR001725,AGR001726
iCLIP tia1 B4	4	sphere	iCLIP	FLAG_antibody	33947011	6998369	5391319		SRR8787788,SRR8787785	AGS001037	AGN001459	4	AGR001728,AGR001727
iCLIP g3bp1 B2	4	sphere	iCLIP	FLAG_antibody	8328757	519360	1147553		SRR8787786,SRR8787607	AGS001038	AGN001460	2	AGR001731,AGR001732
iCLIP g3bp1 B3	4	sphere	iCLIP	FLAG_antibody	40609589	2518643	4050018		SRR8787609,SRR8787614	AGS001038	AGN001461	3	AGR001733,AGR001734
iCLIP g3bp1 B4	4	sphere	iCLIP	FLAG_antibody	20650537	2028846	3697615		SRR8787613,SRR8787616	AGS001038	AGN001462	4	AGR001735,AGR001736
iCLIP celf1 B2	4	sphere	iCLIP	FLAG_antibody	46125318	12135445	6127713		SRR8787615,SRR8787618	AGS001039	AGN001309	2	AGR001739,AGR001740
iCLIP celf1 B3	4	sphere	iCLIP	FLAG_antibody	19778115	5717455	2630911		SRR8787617,SRR8787620	AGS001039	AGN001310	3	AGR001741,AGR001742
iCLIP celf1 B4	4	sphere	iCLIP	FLAG_antibody	103860283	21933595	17911577		SRR8787619,SRR8787610	AGS001039	AGN001311	4	AGR001743,AGR001744
iCLIP khsrp B1	4	sphere	iCLIP	FLAG_antibody	93020922	24779636	29015849		SRR8787608,SRR8787771	AGS001040	AGN001198	1	AGR001745,AGR001746
iCLIP ddx5 B1	4	sphere	iCLIP	FLAG_antibody	2236373	595369	615100		SRR8787772,SRR8787773	AGS001041	AGN001199	1	AGR001747,AGR001748
iCLIP ythdf1 B1	4	sphere	iCLIP	FLAG_antibody	46260739	10902543	12735240		SRR8787774,SRR8787775	AGS001042	AGN001200	1	AGR001749,AGR001750
iCLIP purbb B1	4	sphere	iCLIP	FLAG_antibody	339716	121808	98668		SRR8787776,SRR8787777	AGS001043	AGN001420	1	AGR001752,AGR001751
iCLIP purbb B2	4	sphere	iCLIP	FLAG_antibody	32593539	7733855	16759998		SRR8787778,SRR8787779	AGS001043	AGN001421	2	AGR001753,AGR001754
iCLIP purbb B3	4	sphere	iCLIP	FLAG_antibody	1173071	264358	446704		SRR8787573,SRR8787594	AGS001043	AGN001422	3	AGR001755,AGR001756
iCLIP control-top B1	4	sphere	iCLIP	FLAG_antibody	8544224	1528686	1329688		SRR8787593,SRR8787592	AGS001044	AGN001443	1	AGR001757,AGR001758
iCLIP control-top B2	4	sphere	iCLIP	FLAG_antibody	58956914	10355142	15394909		SRR8787591,SRR8787590	AGS001044	AGN001444	2	AGR001759,AGR001760
iCLIP control-top B3	4	sphere	iCLIP	FLAG_antibody	44428468	7357366	8608867		SRR8787589,SRR8787588	AGS001044	AGN001445	3	AGR001762,AGR001761
iCLIP control-bottom B1	4	sphere	iCLIP	FLAG_antibody	4977321	902723	999891		SRR8787587,SRR8787586	AGS001045	AGN001446	1	AGR001763,AGR001764
iCLIP control-bottom B2	4	sphere	iCLIP	FLAG_antibody	18748348	3824452	4440633		SRR8787585,SRR8787717	AGS001045	AGN001447	2	AGR001765,AGR001766
iCLIP control-bottom B3	4	sphere	iCLIP	FLAG_antibody	6284831	1127601	1058984		SRR8787718,SRR8787715	AGS001045	AGN001448	3	AGR001767,AGR001768
iCLIP fubp1 B1	4	sphere	iCLIP	FLAG_antibody	11821821	3276011	3974999		SRR8787716,SRR8787713	AGS001046	AGN001451	1	AGR001769,AGR001770
iCLIP fubp1 B2	4	sphere	iCLIP	FLAG_antibody	7294952	1556781	1931922		SRR8787714,SRR8787711	AGS001046	AGN001452	2	AGR001771,AGR001772
iCLIP fubp1 B3	4	sphere	iCLIP	FLAG_antibody	12164428	2469016	2626489		SRR8787712,SRR8787719	AGS001046	AGN001453	3	AGR001773,AGR001774
iCLIP ptbp2a B1	4	sphere	iCLIP	FLAG_antibody	385261	42616	44482		SRR8787720,SRR8787749	AGS001047	AGN001454	1	AGR001775,AGR001776
iCLIP ptbp2a B2	4	sphere	iCLIP	FLAG_antibody	49039274	1074369	1110757		SRR8787748,SRR8787751	AGS001047	AGN001455	2	AGR001777,AGR001778
iCLIP ptbp2a B3	4	sphere	iCLIP	FLAG_antibody	14916541	874771	1618116		SRR8787750,SRR8787745	AGS001047	AGN001456	3	AGR001780,AGR001779
iCLIP celf1 patA B1	4	sphere	iCLIP,pateamineA	FLAG_antibody	27033349	6057414	4120788		SRR8787744	AGS001048	AGN001491	1	AGR001781
iCLIP celf1 patA B2	4	sphere	iCLIP,pateamineA	FLAG_antibody	10201126	5269034	1227653		SRR8787747	AGS001048	AGN001492	2	AGR001782
iCLIP celf1 patA B3	4	sphere	iCLIP,pateamineA	FLAG_antibody	16577232	4427098	2470225		SRR8787746	AGS001048	AGN001493	3	AGR001783
iCLIP hug patA B1	4	sphere	iCLIP,pateamineA	FLAG_antibody	16705634	9286770	2061745		SRR8787753,SRR8787752	AGS001049	AGN001494	1	AGR001784,AGR001785
iCLIP hug patA B2	4	sphere	iCLIP,pateamineA	FLAG_antibody	22441543	13675157	3070762		SRR8787660,SRR8787661	AGS001049	AGN001495	2	AGR001786,AGR001787
iCLIP hug patA B3	4	sphere	iCLIP,pateamineA	FLAG_antibody	10181843	3969734	1531930		SRR8787662,SRR8787663	AGS001049	AGN001496	3	AGR001788,AGR001789
iCLIP zff9 patA B1	4	sphere	iCLIP,pateamineA	FLAG_antibody	10118786	3133202	1385368		SRR8787656	AGS001050	AGN001497	1	AGR001790
iCLIP zff9 patA B2	4	sphere	iCLIP,pateamineA	FLAG_antibody	16858399	4664995	2147549		SRR8787657	AGS001050	AGN001498	2	AGR001791
iCLIP zff9 patA B3	4	sphere	iCLIP,pateamineA	FLAG_antibody	22530463	6192828	5243782		SRR8787658	AGS001050	AGN001499	3	AGR001792
iCLIP purbb patA B1	4	sphere	iCLIP,pateamineA	FLAG_antibody	16521498	3554101	1314777		SRR8787659,SRR8787654	AGS001051	AGN001500	1	AGR001793,AGR001794
iCLIP purbb patA B2	4	sphere	iCLIP,pateamineA	FLAG_antibody	38413534	5353522	3440088		SRR8787655,SRR8787686	AGS001051	AGN001501	2	AGR001795,AGR001796
iCLIP purbb patA B3	4	sphere	iCLIP,pateamineA	FLAG_antibody	11194757	3074114	1124936		SRR8787685,SRR8787684	AGS001051	AGN001502	3	AGR001797,AGR001798
iCLIP celf1 6h patA B1	6	shield	iCLIP,pateamineA	FLAG_antibody	11250077	2633216	1126987		SRR8787683	AGS001052	AGN001503	1	AGR001799
iCLIP celf1 6h patA B2	6	shield	iCLIP,pateamineA	FLAG_antibody	6973483	2891895	730144		SRR8787690	AGS001052	AGN001504	2	AGR001800
iCLIP celf1 6h patA B3	6	shield	iCLIP,pateamineA	FLAG_antibody	29378629	8032844	4646863		SRR8787689	AGS001052	AGN001505	3	AGR001801
iCLIP ddx6 B1	4	sphere	iCLIP	ddx6_antibody_ab40684	9737827	238996	483217		SRR8787688,SRR8787687	AGS001053	AGN001506	1	AGR001802,AGR001803
iCLIP ddx6 B3	4	sphere	iCLIP	ddx6_antibody_ab40684	4061601	182463	327452		SRR8787682,SRR8787681	AGS001053	AGN001508	3	AGR001806,AGR001807
TOTAL					6046640235	2994634939	835254447
