# Supplementary material for: Genome wide analysis of 3′ UTR sequence elements and proteins regulating mRNA stability during maternal-to-zygotic transition in zebrafish
Source: HighWire-hosted journal article supplement (doi:10.1101/gr.245159.118), 2019-06-21
Supplement: Supplemental_Table_S2_JDedit.xlsx [file Supplemental_Table_S2_JDedit.xlsx]

## Sheet: tt
Supplemental Table S2. DESeq2 normalization factors calculated on total exogenous yeast spike-in RNA reads.
Comparison	Sample	DESeq yeast factor
2h vs 6h sample	WT 64c pA B1	0.209836
	WT 64c pA B2	0.279162
	WT shield pA B1	0.224742
	WT shield pA B2	0.28626
6h vs aAm 6h sample	WT aAm shield pA B1	0.256772
	WT aAm shield pA B2	0.306297
	WT shield pA B1	0.192165
	WT shield pA B2	0.244766
6h vs lna430 6h sample	WT TinyLNA430 shield pA	0.320958
	WT shield pA B1	0.298647
	WT shield pA B2	0.380395
aAm 2h vs aAm 6h sample	WT aAm 64c pA B1	0.170526
	WT aAm 64c pA B2	0.213956
	WT aAm shield pA B1	0.28069
	WT aAm shield pA B2	0.334828
