# Supplementary material for: Genome wide analysis of 3′ UTR sequence elements and proteins regulating mRNA stability during maternal-to-zygotic transition in zebrafish
Source: HighWire-hosted journal article supplement (doi:10.1101/gr.245159.118), 2019-06-21
Supplement: Supplemental_Table_S4_JDedit.xlsx [file Supplemental_Table_S4_JDedit.xlsx]

## Sheet: Colum header description
Supplemental Table S4. Interactome capture identified proteins.
ENSEMBL gene ID	gene identifier
name	gene names
Control 1	log2 protein intensities from non-UV cross-linked sample, replicate 1
Control 2	log2 protein intensities from non-UV cross-linked sample, replicate 2
Control 3	log2 protein intensities from non-UV cross-linked sample, replicate 3
control	average of log2 protein intensities from non-UV cross-linked
UV 1	log2 protein intensities from UV cross-linked sample, replicate 1
UV 2	log2 protein intensities from UV cross-linked sample, replicate 2
UV 3	log2 protein intensities from UV cross-linked sample, replicate 3
uv	average of log2 protein intensities from UV cross-linked
UV wDrug1	log2 protein intensities from UV cross-linked sample with Amanitin, replicate 1
UV wDrug2	log2 protein intensities from UV cross-linked sample with Amanitin, replicate 2
UV wDrug3	log2 protein intensities from UV cross-linked sample with Amanitin, replicate 3
ama	average of log2 protein intensities from UV cross-linked with Amanitin
Peptides	number of peptides matching the protein
Unique peptides	number of peptides only mapping to this protein
log10pvWT	-log10 p-value of WT (+UV) vs Control (-UV)
log2WT	average log2 intesity in UV - average log2 intesity in control
SigWT	proteins significant with a threshold value of 0.05 and SO= 1
log10pvAma	-log10 p-value of Amanitin (ama) vs Control (-UV)
log2Ama	average log2 intesity in Ama - average log2 intesity in control
SigAma	proteins significant with a threshold value of 0.05 and SO= 1
log2AmavsWT	ratio of normalized intesities between WT and Ama (log2Ama - log2WT)
log2pAmavsWT	log2 p-value of normalized WT vs AMA
HeLa	mRNA-interactome data from Castello et al., Cell 2012. PMID: 22658674
HEK293	mRNA-interactome data from Baltz et al., Mol Cell 2012. PMID: 22681889
mESC	mRNA-interactome data from Kwon et al., Nat Struct Mol Biol 2013. PMID: 23912277
cardiomyocyte	mRNA-interactome data from Liao et al., Cell Rep 2016. PMID: 27452465
zebrafish	mRNA-interactome data from Despic et al., Genome Res 2017. PMID: 28381614

## Sheet: Interactome data
ENSEMBL gene ID	name	Control 1	Control 2	Control 3	control	UV 1	UV 2	UV 3	uv	UV wDrug1	UV wDrug2	UV wDrug3	ama	Peptides	Unique peptides	-log10pvWT	log2WT	SigWT	-log10pvAma	log2Ama	SigAma	log2AmavsWT	log2pAmavsWT	HeLa	HEK293	mESC	cardiomyocyte	zebrafish
ENSDARG00000004757	ybx1	24.3927	26.3394	25.5151	25.4157	30.5001	30.9339	30.9511	30.795	30.014	29.5778	30.014	29.8686	8	8	3.11	5.38	+	2.8	4.45	+	-0.93	1.96	Detected	Detected	Detected	Detected	Detected
ENSDARG00000020153	rps18	19.1792	25.2276	19.0153	21.1407	26.246	27.4724	27.5404	27.0863	26.9632	26.3394	25.9041	26.4022	4	4	1.33	5.95	+	1.2	5.26	+	-0.68	0.59	No Evidence	No Evidence	No Evidence	No Evidence	No Evidence
ENSDARG00000014867	rpl8	17.3204	18.6071	18.4272	18.1182	29.3074	29.6643	29.9794	29.6504	28.1178	27.6639	28.7062	28.1627	4	4	4.87	11.53	+	4.43	10.04	+	-1.49	1.84	Detected	Detected	Detected	Detected	Detected
ENSDARG00000062916	mrpl37	17.8888	18.9043	18.2083	18.3338	28.8475	29.006	28.3252	28.7262	29.1153	28.8929	26.5581	28.1888	8	8	5.05	10.39	+	3.46	9.85	+	-0.54	0.25	Detected	No Evidence	No Evidence	Detected	Detected
ENSDARG00000059398	myef2	18.2023	18.7372	19.876	18.9385	25.7133	26.1244	25.4023	25.7467	25.757	24.6956	24.5973	25.0166	5	5	3.66	6.81	+	3.22	6.08	+	-0.73	0.79	No Evidence	Detected	Detected	Detected	Detected
ENSDARG00000039347	rps24	19.5817	26.0106	24.5079	23.3668	26.4141	28.0329	29.0849	27.8439	28.5228	27.4708	27.062	27.6852	2	2	1	4.48	+	1.02	4.32	+	-0.16	0.06	Detected	Detected	Detected	Detected	Detected
ENSDARG00000035692	rps3a	19.9565	21.4376	18.586	19.9934	28.1784	28.2158	27.8917	28.0953	27.1827	26.2685	26.1663	26.5392	5	5	3.21	8.1	+	2.75	6.55	+	-1.56	2	No Evidence	No Evidence	Detected	Detected	Detected
ENSDARG00000002597	pabpc1l	18.6056	18.9644	18.2255	18.5985	26.8435	27.3578	26.4285	26.8766	26.296	25.6757	25.85	25.9406	10	4	4.76	8.28	+	4.89	7.34	+	-0.94	1.34	No Evidence	No Evidence	No Evidence	No Evidence	Detected
ENSDARG00000086896	fubp3l	18.7403	18.8217	18.8163	18.7928	25.5943	27.6642	28.0897	27.116	26.8641	18.5348	26.3351	23.9113	4	4	3.38	8.32	+	0.89	5.12	+	-3.2	0.5	Detected	Detected	Detected	Detected	Detected
ENSDARG00000059246	hnrnpd	18.4899	19.1686	19.2326	18.9637	27.2352	27.7161	28.1061	27.6858	25.3509	27.1996	26.0695	26.2067	5	4	4.83	8.72	+	3.6	7.24	+	-1.48	1.17	Detected	Detected	Detected	Detected	Detected
ENSDARG00000017439	eif4bb	19.3839	19.3293	20.4813	19.7315	28.6737	28.7232	28.4021	28.5996	27.8413	26.3625	26.66	26.9546	7	5	4.66	8.87	+	3.6	7.22	+	-1.65	1.63	No Evidence	No Evidence	No Evidence	No Evidence	No Evidence
ENSDARG00000074572	grbp2	20.3283	19.4817	18.5341	19.448	26.7609	26.0213	26.3273	26.3698	24.4129	24.5012	23.9784	24.2975	4	3	3.61	6.92	+	3.06	4.85	+	-2.07	2.82	No Evidence	No Evidence	No Evidence	No Evidence	Detected
ENSDARG00000005551	hnrnph1l	19.2024	19.3385	18.7372	19.0927	28.4935	28.6619	28.9292	28.6949	29.1302	28.6485	28.472	28.7502	3	2	5.77	9.6	+	5.45	9.66	+	0.06	0.08	Detected	Detected	Detected	Detected	Detected
ENSDARG00000036675	hnrnpa1b	19.7157	19.5699	19.658	19.6479	23.7055	22.7314	23.9161	23.451	24.8213	24.4909	25.1125	24.8082	4	4	3.31	3.8	+	5.01	5.16	+	1.36	1.54	Detected	Detected	Detected	Detected	Detected
ENSDARG00000005791	rpl28	20.7962	21.4902	19.0417	20.4427	26.4141	28.0762	27.383	27.2911	26.2342	21.3851	26.6299	24.7498	4	4	2.84	6.85	+	1.1	4.31	+	-2.54	0.66	No Evidence	No Evidence	No Evidence	No Evidence	Detected
ENSDARG00000026801	stau2	20.8006	22.1097	18.9303	20.6135	27.3815	27.4597	27.4311	27.4241	27.1579	26.8398	26.5842	26.8606	7	7	2.75	6.81	+	2.58	6.25	+	-0.56	1.55	Detected	Detected	No Evidence	Detected	Detected
ENSDARG00000053810	hnrnpc	17.7245	23.039	18.8901	19.8845	30.6201	30.9661	31.153	30.9131	30.0153	29.6449	29.1235	29.5946	13	8	2.61	11.03	+	2.4	9.71	+	-1.32	1.92	Detected	Detected	Detected	Detected	Detected
ENSDARG00000038695	elavl1	20.0933	23.7752	18.2908	20.7197	30.1414	30.9291	30.8478	30.6394	31.137	30.6906	30.8559	30.8945	8	5	2.43	9.92	+	2.48	10.17	+	0.26	0.38	Detected	Detected	Detected	Detected	Detected
ENSDARG00000042252	eif4h	18.6459	18.9529	19.6734	19.0907	24.8204	25.9589	27.5755	26.1182	24.0274	23.8351	23.4963	23.7863	6	6	2.92	7.03	+	3.79	4.7	+	-2.33	1.34	Detected	Detected	Detected	Detected	Detected
ENSDARG00000043970	lrpprc	18.8899	20.04	17.3244	18.7515	27.9361	28.845	28.2588	28.3467	26.0339	26.9892	26.4822	26.5018	16	16	3.49	9.6	+	3.13	7.75	+	-1.84	2.07	Detected	Detected	Detected	Detected	Detected
ENSDARG00000006766	snd1	21.3369	22.3464	21.039	21.5741	27.492	28.0505	28.0039	27.8488	26.3676	25.8139	25.1193	25.7669	11	11	3.88	6.27	+	2.84	4.19	+	-2.08	2.18	Detected	Detected	Detected	Detected	Detected
ENSDARG00000026489	khsrp	19.2946	18.9153	18.5234	18.9111	28.179	28.3076	28.0898	28.1921	26.5473	25.5367	25.893	25.9923	7	5	5.64	9.28	+	4.36	7.08	+	-2.2	2.72	Detected	Detected	Detected	Detected	Detected
ENSDARG00000022579	hnrnpc1/c2-like	18.7389	19.1826	19.3925	19.1047	28.7958	28.1394	29.3359	28.757	27.5464	27.127	27.9128	27.5287	13	1	4.77	9.65	+	5.03	8.42	+	-1.23	1.39	No Evidence	No Evidence	No Evidence	No Evidence	No Evidence
ENSDARG00000087058	fubp3	21.9352	18.4574	18.7876	19.7267	28.7993	28.7765	29.0073	28.861	28.1873	28.2677	28.5172	28.3241	7	4	2.92	9.13	+	2.82	8.6	+	-0.54	1.91	No Evidence	No Evidence	No Evidence	No Evidence	No Evidence
ENSDARG00000013351	cirbp	17.8093	24.9176	18.523	20.4166	30.3615	29.9074	30.8871	30.3853	31.4536	31.1201	29.9066	30.8268	14	13	1.92	9.97	+	1.97	10.41	+	0.44	0.33	Detected	Detected	Detected	Detected	Detected
ENSDARG00000026723	syncripl	18.1592	20.0101	18.1331	18.7675	29.257	29.5608	29.5149	29.4442	30.5696	30.02	29.5979	30.0625	9	5	4.15	10.68	+	4.11	11.3	+	0.62	0.98	Detected	Detected	Detected	Detected	Detected
ENSDARG00000009830	hdlbp	18.2006	21.9881	21.8587	20.6825	26.0493	27.0523	27.4413	26.8476	27.2984	26.3676	26.1838	26.6166	7	7	2.03	6.17	+	2	5.93	+	-0.23	0.16	Detected	Detected	Detected	Detected	Detected
ENSDARG00000005774	pl10	19.1436	19.3042	19.9174	19.4551	27.9465	28.057	28.624	28.2092	29.2942	28.6397	27.3298	28.4212	14	5	5	8.75	+	3.87	8.97	+	0.21	0.13	Detected	Detected	Detected	Detected	Detected
ENSDARG00000007960	hnrnpab	19.3154	19.2147	18.1771	18.9024	29.2339	29.3745	29.7179	29.4421	30.3106	29.6659	29.348	29.7748	7	4	4.95	10.54	+	4.72	10.87	+	0.33	0.45	Detected	Detected	Detected	Detected	Detected
ENSDARG00000054818	rpl32	18.736	22.8254	18.3976	19.9863	26.0926	26.3865	27.0591	26.5128	27.512	25.0803	27.4024	26.6649	2	2	1.96	6.53	+	1.83	6.68	+	0.15	0.06	No Evidence	No Evidence	Detected	Detected	No Evidence
ENSDARG00000053365	rpl31	24.3564	24.9643	25.517	24.9459	26.8387	27.5355	27.906	27.4267	27.8387	26.9084	28.0038	27.5836	2	2	2.25	2.48	+	2.28	2.64	+	0.16	0.12	No Evidence	No Evidence	No Evidence	Detected	Detected
ENSDARG00000042049	cirbp	18.1287	19.3622	19.4687	18.9865	25.2913	26.2722	26.7456	26.103	25.2177	24.6856	24.9941	24.9658	7	6	3.52	7.12	+	3.71	5.98	+	-1.14	1.17	No Evidence	No Evidence	No Evidence	No Evidence	No Evidence
ENSDARG00000058451	rpl6	27.6762	27.6974	27.8416	27.7384	29.8825	30.3693	30.0552	30.1023	30.3574	29.0303	30.7193	30.0357	11	11	4	2.36	+	1.95	2.3	+	-0.07	0.04	No Evidence	No Evidence	Detected	Detected	Detected
ENSDARG00000014690	rps4x	18.0078	26.3211	18.1923	20.8404	28.1322	28.7668	28.5601	28.4864	27.1523	25.8882	25.8832	26.3079	10	10	1.3	7.65	+	0.92	5.47	+	-2.18	2.04	Detected	Detected	Detected	Detected	Detected
ENSDARG00000022129	rbm4.3	18.5077	18.6128	18.7842	18.6349	27.3647	27.5158	24.9104	26.597	27.8694	26.018	26.9942	26.9605	8	8	3.14	7.96	+	3.98	8.33	+	0.36	0.13	Detected	Detected	Detected	Detected	Detected
ENSDARG00000003938	rpa1	18.6905	22.3018	17.9731	19.6551	28.8063	28.6228	28.5899	28.673	29.0436	28.0674	28.5488	28.5533	11	11	2.59	9.02	+	2.54	8.9	+	-0.12	0.15	No Evidence	No Evidence	No Evidence	Detected	Detected
ENSDARG00000017568	hnrnpabb	19.7325	20.3685	19.595	19.8987	25.7613	25.2292	25.512	25.5009	28.4289	27.86	27.2668	27.8519	5	2	4.41	5.6	+	4.37	7.95	+	2.35	2.51	No Evidence	No Evidence	No Evidence	No Evidence	No Evidence
ENSDARG00000004452	tardbpl	19.4456	18.7969	17.668	18.6368	27.2954	27.2135	27.6684	27.3924	27.3183	24.9792	26.0984	26.132	7	4	4.08	8.76	+	3.04	7.5	+	-1.26	0.85	Detected	Detected	Detected	Detected	Detected
ENSDARG00000040881	hnrnph1	20.1561	19.7831	17.9024	19.2805	24.3334	24.6426	25.3321	24.7694	24.8904	24.4234	24.0898	24.4679	2	1	2.72	5.49	+	2.67	5.19	+	-0.3	0.33	Detected	Detected	Detected	Detected	Detected
ENSDARG00000006600	lsm14aa	20.165	16.7281	19.4612	18.7848	26.33	24.8418	26.4566	25.8761	23.7603	23.467	24.7881	24.0051	5	3	2.43	7.09	+	2.02	5.22	+	-1.87	1.34	Detected	Detected	Detected	Detected	Detected
ENSDARG00000036629	rps14	19.4201	24.6522	18.9143	20.9955	27.653	28.404	28.2378	28.0983	27.361	27.1366	26.3342	26.9439	2	2	1.73	7.1	+	1.48	5.95	+	-1.15	1.39	No Evidence	No Evidence	Detected	Detected	Detected
ENSDARG00000043453	rps5	18.8677	18.9915	19.6606	19.1732	24.3693	24.5681	24.6623	24.5332	25.0237	24.7005	24.4347	24.7196	2	2	4.48	5.36	+	4.3	5.55	+	0.19	0.42	Detected	Detected	Detected	Detected	Detected
ENSDARG00000007320	rpl7	18.8308	18.4435	24.4686	20.581	24.3801	27.9858	26.3766	26.2475	27.3509	26.7343	27.1011	27.0621	6	6	1.21	5.67	+	1.53	6.48	+	0.81	0.31	No Evidence	No Evidence	No Evidence	Detected	Detected
ENSDARG00000046119	rps3	20.6087	18.5412	18.3194	19.1565	27.0106	28.804	27.727	27.8472	27.3541	27.3846	26.3073	27.0154	7	7	3.2	8.69	+	3.2	7.86	+	-0.83	0.59	No Evidence	No Evidence	No Evidence	No Evidence	No Evidence
ENSDARG00000014569	hnrpr	19.4571	18.9331	18.044	18.8114	28.8676	28.9595	29.4155	29.0809	27.4013	27.0492	27.0828	27.1778	3	2	4.68	10.27	+	4.4	8.37	+	-1.9	3.14	Detected	Detected	Detected	Detected	Detected
ENSDARG00000001915	phc2b	18.2413	18.9136	20.3936	19.1828	19.2639	24.6289	24.3662	22.753	26.4044	25.3188	26.2497	25.9909	4	2	0.9	3.57	+	3.16	6.81	+	3.24	0.85	No Evidence	No Evidence	No Evidence	No Evidence	No Evidence
ENSDARG00000036161	hnrnpa0l	18.7845	21.6031	19.705	20.0309	27.7395	28.5641	28.155	28.1529	29.0913	26.8148	28.8304	28.2455	3	3	3.15	8.12	+	2.77	8.21	+	0.09	0.04	Detected	Detected	Detected	Detected	Detected
ENSDARG00000053058	rps11	20.1485	18.138	18.9645	19.0836	27.1105	27.7212	26.9527	27.2615	26.343	26.4983	25.2207	26.0207	4	4	3.7	8.18	+	3.21	6.94	+	-1.24	1.25	No Evidence	No Evidence	Detected	Detected	No Evidence
ENSDARG00000035324	hnrpl	19.4206	18.923	18.1778	18.8405	26.495	26.4577	26.1921	26.3816	26.2809	26.0298	24.7318	25.6808	4	3	4.45	7.54	+	3.47	6.84	+	-0.7	0.65	Detected	Detected	Detected	Detected	Detected
ENSDARG00000041182	rpl4	23.2572	25.4302	23.9019	24.1964	27.889	29.0346	29.1944	28.706	27.9128	27.7389	26.3506	27.3341	8	8	2.38	4.51	+	1.74	3.14	+	-1.37	1	Detected	Detected	No Evidence	Detected	Detected
ENSDARG00000025073	rpl18a	23.8641	24.306	20.3035	22.8246	28.2696	29.0615	28.5842	28.6384	28.1622	27.4477	26.623	27.4109	4	4	1.97	5.81	+	1.57	4.59	+	-1.23	1.15	Detected	Detected	Detected	Detected	Detected
ENSDARG00000029500	rpl34	18.2704	17.8809	18.7931	18.3148	25.095	25.8076	26.6584	25.8537	26.7603	19.0501	23.9889	23.2664	2	2	3.87	7.54	+	1.02	4.95	+	-2.59	0.49	No Evidence	No Evidence	No Evidence	Detected	Detected
ENSDARG00000040031	tardbp	18.051	20.4158	18.369	18.9453	28.5239	27.9295	28.5198	28.3244	24.9989	26.1569	27.4392	26.1983	8	5	3.59	9.38	+	2.68	7.25	+	-2.13	1.36	Detected	Detected	Detected	Detected	Detected
ENSDARG00000018334	rpl35	25.1493	25.8722	17.8468	22.9561	27.7034	29.1873	28.3945	28.4284	29.0374	26.9138	28.679	28.2101	2	2	0.99	5.47	+	0.93	5.25	+	-0.22	0.1	No Evidence	No Evidence	Detected	No Evidence	No Evidence
ENSDARG00000041699	piwil1	18.9098	18.5465	18.692	18.7161	23.4536	22.6535	23.8024	23.3032	23.5877	25.0088	23.724	24.1068	5	5	3.68	4.59	+	3.5	5.39	+	0.8	0.64	No Evidence	No Evidence	No Evidence	No Evidence	Detected
ENSDARG00000052856	khdrbs1a	19.5211	19.3349	18.8307	19.2289	27.1309	27.4371	27.1561	27.2414	27.3584	20.7755	18.2167	22.1169	4	3	5.4	8.01	+	0.46	2.89		-5.12	0.88	Detected	Detected	Detected	Detected	Detected
ENSDARG00000009950	edf1	19.1948	19.7992	19.1455	19.3798	24.626	23.3746	24.2118	24.0708	19.7386	19.0518	24.3773	21.0559	3	3	3.42	4.69	+	0.42	1.68		-3.01	0.81	Detected	Detected	Detected	Detected	Detected
ENSDARG00000006200	eif4g1	19.3742	19.1549	21.1009	19.8767	24.8548	25.5173	25.0051	25.1257	17.9879	18.7993	18.9208	18.5693	4	4	2.9	5.25	+	0.89	-1.31		-6.56	4.3	Detected	Detected	Detected	Detected	Detected
ENSDARG00000002710	ncl	20.4263	19.3078	19.2986	19.6776	26.263	26.0283	27.4365	26.5759	19.163	19.483	18.7499	19.132	6	6	3.56	6.9	+	0.56	-0.55		-7.44	3.98	Detected	Detected	Detected	Detected	Detected
ENSDARG00000090426	h1l	19.1712	21.9576	19.8272	20.3187	22.6284	24.3139	23.5124	23.4849	20.1082	18.5267	18.678	19.1043	3	2	1.51	3.17	+	0.55	-1.21		-4.38	2.48	No Evidence	No Evidence	No Evidence	No Evidence	No Evidence
ENSDARG00000044942	mrpl45	18.4122	18.4758	19.7916	18.8932	24.2109	26.0749	23.1483	24.478	24.6581	25.1434	18.201	22.6675	3	3	2.35	5.58	+	0.76	3.77		-1.81	0.31	Detected	Detected	No Evidence	Detected	Detected
ENSDARG00000031494	prrc2a	18.8168	16.9851	18.6673	18.1564	22.9636	25.2874	24.9592	24.4034	18.7272	18.3056	19.3825	18.8051	8	8	2.59	6.25	+	0.41	0.65		-5.6	2.68	No Evidence	Detected	No Evidence	Detected	Detected
ENSDARG00000016177	eif4enif1	19.9268	18.8984	18.3594	19.0615	24.2998	24.2136	23.2825	23.932	23.6621	18.0157	19.627	20.4349	3	3	3.01	4.87	+	0.32	1.37		-3.5	0.96	No Evidence	Detected	Detected	Detected	Detected
ENSDARG00000057556	rpl17	17.8212	25.2765	19.749	20.9489	23.5256	26.6424	27.5065	25.8915	24.844	22.749	23.3568	23.6499	4	4	0.91	4.94	+	0.51	2.7		-2.24	0.76	No Evidence	No Evidence	Detected	No Evidence	No Evidence
ENSDARG00000038068	ddx5	19.6693	18.6597	18.4453	18.9248	25.5311	25.5806	25.0727	25.3948	19.2949	19.2883	18.7019	19.095	2	2	4.02	6.47	+	0.15	0.17		-6.3	4.8	Detected	Detected	Detected	Detected	Detected
ENSDARG00000045776	zff9	19.5734	18.4757	17.3964	18.4818	26.6712	26.8258	27.2747	26.9239	18.9615	20.4268	19.277	19.5551	3	3	3.68	8.44	+	0.63	1.07		-7.37	3.98	Detected	Detected	Detected	Detected	Detected
ENSDARG00000055080	rbm4.2	18.8493	19.3858	18.2558	18.8303	23.8807	25.0674	25.1089	24.6857	19.2187	20.0164	18.7487	19.328	4	4	3.46	5.86	+	0.43	0.5		-5.36	3.22	Detected	Detected	Detected	Detected	Detected
ENSDARG00000025386	lsm14b	24.4368	26.9197	25.5402	25.6322	28.6393	28.8195	29.4256	28.9615	29.1556	27.9864	27.0098	28.0506	10	9	1.93	3.33	+	1.2	2.42		-0.91	0.62	No Evidence	Detected	Detected	Detected	Detected
ENSDARG00000057583	prrc2c	20.4351	18.1843	18.4433	19.0209	25.4628	25.8027	25.8214	25.6956	24.3579	18.5775	19.3038	20.7464	7	7	3.12	6.67	+	0.37	1.73		-4.95	1.27	Detected	Detected	No Evidence	Detected	Detected
ENSDARG00000015230	ptbp2a	19.9842	18.9818	18.7907	19.2522	25.3365	24.3443	25.0417	24.9075	18.5244	18.8377	23.9704	20.4441	3	3	3.55	5.66	+	0.26	1.19		-4.46	1.17	No Evidence	No Evidence	No Evidence	No Evidence	No Evidence
ENSDARG00000089073	akap8l	17.9956	18.0259	18.3685	18.13	23.9444	24.3037	23.5049	23.9177	18.3737	19.4875	19.0611	18.9741	2	2	4.62	5.79	+	1.15	0.84		-4.94	3.62	No Evidence	No Evidence	No Evidence	No Evidence	No Evidence
ENSDARG00000089302	hnrnpa0a	19.6177	19.0123	19.0035	19.2112	25.9731	25.7689	25.9045	25.8822	17.3417	19.4081	18.3546	18.3681	2	2	5.22	6.67	+	0.6	-0.84		-7.51	3.63	Detected	Detected	Detected	Detected	Detected
ENSDARG00000015490	rpl24	19.9963	18.8667	20.6615	19.8415	26.4893	27.9122	27.7503	27.3839	18.9894	18.9117	18.9791	18.9601	2	2	3.4	7.54	+	0.77	-0.88		-8.42	4.32	No Evidence	No Evidence	No Evidence	No Evidence	No Evidence
ENSDARG00000035734	matrin3	18.7297	18.3631	19.1256	18.7395	24.5287	20.4002	24.1291	23.0193	21.0417	18.3731	18.3439	19.2529	2	2	1.49	4.28	+	0.22	0.51		-3.77	1.11	No Evidence	No Evidence	No Evidence	No Evidence	No Evidence
ENSDARG00000016302	upf1	18.9225	21.7842	19.0281	19.9116	24.4504	25.8025	22.7502	24.3344	22.5993	22.7659	20.2389	21.868	4	4	1.58	4.42	+	0.72	1.96		-2.47	0.96	Detected	Detected	Detected	Detected	Detected
ENSDARG00000042566	rps7	20.0353	18.6987	19.4244	19.3861	19.9197	26.5862	27.0586	24.5215	19.2517	19.0347	19.0676	19.118	2	2	1.03	5.14	+	0.27	-0.27		-5.4	1.1	Detected	Detected	Detected	Detected	No Evidence
ENSDARG00000014591	ilf2	18.8297	19.1683	19.7579	19.252	26.3807	26.9277	26.5723	26.6269	19.5927	20.0657	19.7896	19.816	2	2	4.7	7.37	+	0.86	0.56		-6.81	5.26	Detected	Detected	Detected	Detected	Detected
ENSDARG00000017741	g3bp1	21.4461	19.9407	18.526	19.9709	24.223	25.3444	24.2249	24.5974	20.1476	20.6331	23.9412	21.574	4	3	2.13	4.63	+	0.48	1.6		-3.02	1.14	Detected	Detected	Detected	No Evidence	Detected
ENSDARG00000029248	fubp1	19.1904	19.4812	18.7904	19.154	23.4793	25.4694	24.3905	24.4464	19.7724	18.6451	22.8827	20.4334	5	3	3.02	5.29	+	0.43	1.28		-4.01	1.35	Detected	Detected	Detected	Detected	Detected
ENSDARG00000030602	rps19	19.4702	19.0735	19.5347	19.3595	23.7861	23.3974	24.885	24.0228	21.5087	23.7675	18.4656	21.2472	3	3	3.24	4.66	+	0.54	1.89		-2.78	0.8	No Evidence	No Evidence	Detected	Detected	No Evidence
ENSDARG00000068013	purb	18.5064	18.0775	19.575	18.7197	23.0366	22.8305	23.0353	22.9675	19.7639	18.6791	17.3938	18.6123	4	1	3.15	4.25	+	0.04	-0.11		-4.36	2.5	No Evidence	No Evidence	No Evidence	No Evidence	No Evidence
ENSDARG00000021257	eif3d	18.2002	19.1051	18.4235	18.5763	24.9692	25.335	23.2133	24.5058	18.2964	24.0483	19.767	20.7039	2	2	2.95	5.93	+	0.54	2.13		-3.8	0.96	Detected	Detected	Detected	Detected	Detected
ENSDARG00000052536	tia1	19.2293	18.3245	19.2926	18.9488	27.4747	24.6899	27.0201	26.3949	19.6594	19.8646	27.1339	22.2193	2	1	2.9	7.45	+	0.59	3.27		-4.18	0.73	Detected	Detected	Detected	Detected	Detected
ENSDARG00000027734	srsf4	19.4096	18.682	19.4944	19.1953	25.2231	26.0633	24.9811	25.4225	18.9009	18.5795	17.7486	18.4096	3	2	3.93	6.23	+	0.85	-0.79		-7.01	3.91	Detected	Detected	Detected	Detected	No Evidence
ENSDARG00000068822	purba	19.648	19.7172	17.9267	19.0973	27.0945	26.734	27.2041	27.0109	23.8995	22.4496	23.5596	23.3029	4	1	3.71	7.91	+	2.34	4.21	+	-3.71	2.89	No Evidence	No Evidence	No Evidence	Detected	Detected
ENSDARG00000068820	h2afva	17.6158	20.2254	19.0569	18.966	25.1671	19.5022	26.6583	23.7759	25.7215	20.1613	25.2623	23.715	2	1	0.98	4.81	+	1.15	4.75	+	-0.06	0.01	No Evidence	No Evidence	No Evidence	No Evidence	No Evidence
ENSDARG00000005315	celf1	18.9977	18.115	18.5224	18.545	28.9733	28.5933	29.3431	28.9699	29.4625	28.6251	28.8747	28.9874	9	9	5.2	10.42	+	5.09	10.44	+	0.02	0.02	Detected	Detected	Detected	Detected	Detected
ENSDARG00000074758	csde1	17.1229	18.8151	18.7311	18.223	26.838	27.3336	26.9575	27.043	26.7216	24.9783	19.0791	23.593	7	7	3.99	8.82	+	1.06	5.37	+	-3.45	0.68	Detected	Detected	Detected	Detected	Detected
ENSDARG00000016443	eif3c	19.1775	19.6819	18.7423	19.2006	25.7347	26.8276	26.0827	26.215	25.3832	24.9194	24.3833	24.8953	5	5	4.12	7.01	+	3.86	5.69	+	-1.32	1.42	Detected	Detected	Detected	Detected	Detected
ENSDARG00000017219	pabpc1a	17.9314	21.3605	19.518	19.6033	29.2649	29.3455	29.2254	29.2786	29.4597	28.6374	28.8032	28.9668	13	7	3.21	9.68	+	3.1	9.36	+	-0.31	0.54	No Evidence	No Evidence	Detected	Detected	Detected
ENSDARG00000070437	rpl22	18.9498	19.2723	18.2911	18.8377	27.1058	27.4869	27.1533	27.2487	26.5431	26.3045	25.2365	26.028	4	4	4.94	8.41	+	3.88	7.19	+	-1.22	1.36	Detected	Detected	Detected	Detected	Detected
ENSDARG00000016405	hug	18.5496	20.1209	19.4595	19.3767	27.6658	27.9768	28.174	27.9389	27.7982	26.9014	26.7872	27.1623	8	5	4.24	8.56	+	3.82	7.79	+	-0.78	1.04	No Evidence	No Evidence	No Evidence	No Evidence	No Evidence
ENSDARG00000077291	rps2	26.6569	26.597	25.6483	26.3008	30.5203	30.7036	30.5991	30.6077	30.2029	30.6144	30.6324	30.4833	12	12	3.7	4.31	+	3.52	4.18	+	-0.12	0.34	No Evidence	No Evidence	Detected	Detected	Detected
ENSDARG00000076815	eif3s10	18.4051	19.0853	19.6261	19.0388	19.846	26.0279	26.4298	24.1012	24.5356	19.3359	23.7083	22.5266	5	5	1.1	5.06	+	0.99	3.49	+	-1.57	0.23	Detected	Detected	Detected	Detected	Detected
ENSDARG00000013184	pcbp2	19.5006	19.9864	19.0523	19.5131	25.6464	26.4356	25.4165	25.8328	25.9174	19.6427	24.8792	23.4797	2	2	3.99	6.32	+	0.95	3.97	+	-2.35	0.53	No Evidence	No Evidence	No Evidence	No Evidence	No Evidence
ENSDARG00000026476	tia1l	17.7863	18.6829	20.2334	18.9008	28.8	28.7501	28.6114	28.7205	28.4846	27.8066	27.1917	27.8276	3	2	3.78	9.82	+	3.42	8.93	+	-0.89	1.11	No Evidence	No Evidence	No Evidence	No Evidence	Detected
ENSDARG00000010266	igf2bp3	27.0099	27.8639	24.7001	26.5246	31.7173	32.3993	32.1202	32.0789	32.3744	31.7551	31.1551	31.7615	23	23	2.34	5.55	+	2.18	5.24	+	-0.32	0.32	Detected	Detected	Detected	No Evidence	Detected
ENSDARG00000092115	eif4a1a	19.3274	19.101	19.9115	19.4466	24.7929	25.7558	24.5991	25.0493	19.0699	19.0535	20.9946	19.706	3	3	3.69	5.6	+	0.14	0.26		-5.34	2.72	Detected	Detected	Detected	Detected	Detected
ENSDARG00000070282	h3.2	19.2137	19.4967	18.8223	19.1776	27.003	27.5557	26.0658	26.8748	18.5117	19.2425	18.4548	18.7363	2	2	4.06	7.7	+	0.62	-0.44		-8.14	4.07	No Evidence	No Evidence	No Evidence	No Evidence	No Evidence
ENSDARG00000025174	habp4	19.8332	17.4858	20.1265	19.1485	21.4791	25.994	25.6334	24.3688	18.168	18.4699	18.5501	18.396	3	3	1.45	5.22	+	0.37	-0.75		-5.97	1.83	No Evidence	No Evidence	No Evidence	Detected	Detected
ENSDARG00000023145	pum1	18.5938	17.045	19.4544	18.3644	18.8088	26.602	23.3962	22.9357	18.8354	18.7982	19.9767	19.2034	3	3	0.9	4.57	+	0.45	0.84		-3.73	0.75	No Evidence	No Evidence	No Evidence	No Evidence	No Evidence
ENSDARG00000074242	serbp1	18.3462	18.2927	20.4429	19.0273	24.1809	25.0624	25.6259	24.9564	19.6884	19.0062	23.6377	20.7774	4	4	2.71	5.93	+	0.47	1.75		-4.18	1.3	Detected	Detected	Detected	Detected	No Evidence
ENSDARG00000040184	syncrip	18.6828	18.5535	19.6497	18.962	24.9135	22.8282	25.2469	24.3295	18.1759	19.7722	24.4881	20.812	5	1	2.53	5.37	+	0.41	1.85		-3.52	0.8	Detected	Detected	Detected	Detected	Detected
ENSDARG00000055996	rps8a	20.7108	18.5615	19.169	19.4804	26.6688	28.1211	27.8258	27.5386	27.742	18.8607	26.6284	24.4104	4	4	3.31	8.06	+	0.79	4.93		-3.13	0.48	Detected	Detected	Detected	Detected	Detected
ENSDARG00000070475	khdrbs1b	20.4118	19.4869	19.0229	19.6406	24.5561	24.6908	24.9929	24.7466	19.0487	18.6033	19.18	18.944	3	2	3.55	5.11	+	0.72	-0.7		-5.8	4.93	Detected	Detected	Detected	Detected	Detected
ENSDARG00000011405	rps9	18.7281	19.0177	25.5977	21.1145	26.9345	28.7539	27.9558	27.8814	19.0688	24.323	28.067	23.8196	8	8	1.37	6.77	+	0.32	2.71		-4.06	0.7	Detected	No Evidence	No Evidence	Detected	Detected
ENSDARG00000016447	ythdf1	18.7579	19.1287	18.9012	18.9293	22.8942	24.1838	24.3554	23.8111	19.5567	19.149	19.1425	19.2828	2	2	3.3	4.88	+	0.95	0.35		-4.53	3.15	Detected	Detected	No Evidence	Detected	Detected
ENSDARG00000057328	cth1	19.4715	18.3421	20.0409	19.2848	23.0298	26.3773	24.4738	24.627	19.7542	19.0598	18.5707	19.1282	3	3	2.09	5.34	+	0.09	-0.16		-5.5	2.23	No Evidence	No Evidence	No Evidence	No Evidence	Detected
ENSDARG00000091446	hist1h4	26.3043	27.0709	27.6062	26.9938	28.6205	29.8575	29.39	29.2893	30.9244	29.7825	30.7848	30.4973	6	6	1.93	2.3	+	2.59	3.5	+	1.21	1.12	No Evidence	No Evidence	No Evidence	No Evidence	No Evidence
ENSDARG00000086247	zgc:171781	18.8907	25.1764	19.8948	21.3206	26.6804	27.0443	26.6525	26.7924	26.8616	27.3243	26.9285	27.0381	3	3	1.31	5.47	+	1.37	5.72	+	0.25	0.57	No Evidence	No Evidence	No Evidence	No Evidence	No Evidence
ENSDARG00000067755	ubc	26.5304	27.4985	25.5179	26.5156	29.1737	29.5636	29.6555	29.4643	28.8273	29.2645	28.0231	28.705	5	5	2.12	2.95	+	1.5	2.19	+	-0.76	0.9	No Evidence	No Evidence	No Evidence	No Evidence	No Evidence
ENSDARG00000061338	ddx6	19.0012	18.2209	19.5917	18.938	25.1019	26.2767	26.0767	25.8184	25.227	18.9315	24.0732	22.7439	4	4	3.67	6.88	+	0.9	3.81		-3.07	0.71	Detected	Detected	Detected	Detected	Detected
ENSDARG00000076474	org	17.8572	21.8053	19.0645	19.5757	19.1325	20.3134	17.6714	19.0391	24.2818	22.2937	25.1739	23.9165	2	2	0.14	-0.54		1.4	4.34	+	4.88	1.89	No Evidence	No Evidence	No Evidence	No Evidence	No Evidence
ENSDARG00000020573	ddx3	19.1488	19.4069	18.8015	19.1191	18.9941	24.5906	19.2578	20.9475	20.5295	22.9632	21.3817	21.6248	11	1	0.43	1.83		1.57	2.51	+	0.68	0.13	Detected	Detected	Detected	Detected	Detected
ENSDARG00000013763	rrbp1a	17.9142	18.4464	19.3823	18.581	19.1312	19.7387	19.5299	19.4666	20.8303	22.3841	19.975	21.0631	5	5	0.89	0.89		1.4	2.48	+	1.6	1.03	No Evidence	Detected	No Evidence	Detected	No Evidence
ENSDARG00000025269	pdcd6ip	19.9048	18.2433	18.3157	18.8213	19.3951	18.9002	19.2888	19.1947	23.7544	24.5804	21.463	23.2659	10	10	0.27	0.37		1.84	4.44	+	4.07	1.9	No Evidence	No Evidence	No Evidence	Detected	No Evidence
ENSDARG00000016484	dkc1	18.7767	18.5172	18.716	18.6699	18.6169	20.0372	18.8778	19.1773	23.1416	21.1878	23.2903	22.5399	2	2	0.5	0.51		2.32	3.87	+	3.36	1.85	Detected	No Evidence	Detected	Detected	No Evidence
ENSDARG00000016825	vtg6	23.4519	22.7433	25.5224	23.9059	18.5399	27.0354	19.582	21.7191	20.6795	19.8261	18.5843	19.6966	51	2	0.32	-2.19		1.82	-4.21	+	-2.02	0.3	No Evidence	No Evidence	No Evidence	No Evidence	Detected
ENSDARG00000045914	si:ch211-51e12.7	18.481	20.3919	17.7167	18.8632	22.151	19.1946	25.4915	22.2791	24.9143	24.0662	25.5695	24.85	2	2	0.79	3.42		2.56	5.99	+	2.57	0.62	No Evidence	No Evidence	No Evidence	No Evidence	No Evidence
ENSDARG00000044093	rpl13a	18.5929	19.2883	18.0481	18.6431	19.3949	19.1218	19.8078	19.4415	25.3315	24.1824	24.6553	24.7231	2	2	0.91	0.8		3.62	6.08	+	5.28	3.77	No Evidence	No Evidence	Detected	Detected	No Evidence
ENSDARG00000070019	taf15	17.7909	19.6012	17.4711	18.2878	19.7102	24.3316	18.57	20.8706	17.7246	17.6103	18.8758	18.0702	3	3	0.62	2.58		0.1	-0.22		-2.8	0.71	Detected	Detected	Detected	No Evidence	Detected
ENSDARG00000058105	rpl36a	24.1385	24.9901	18.8601	22.6629	24.5827	25.8571	26.2646	25.5681	23.0195	25.4708	24.5709	24.3537	3	3	0.66	2.91		0.34	1.69		-1.21	0.62	No Evidence	Detected	No Evidence	No Evidence	No Evidence
ENSDARG00000060065	ubap2	18.3658	18.8567	18.0876	18.4367	21.8449	18.8525	22.5939	21.0971	19.1938	19.1832	18.9873	19.1214	3	3	1.07	2.66		1.36	0.68		-1.98	0.8	Detected	No Evidence	Detected	Detected	Detected
ENSDARG00000059303	hnrnpl2	20.6111	21.1214	19.1393	20.2906	20.0225	25.5948	26.0761	23.8978	24.6188	19.3806	25.2263	23.0753	3	2	0.82	3.61		0.65	2.78		-0.82	0.11	Detected	Detected	Detected	Detected	Detected
ENSDARG00000051939	pcxb	19.2357	23.4884	21.4262	21.3834	22.3001	18.6101	19.3271	20.0791	23.6368	21.9758	19.5233	21.712	28	28	0.32	-1.3		0.07	0.33		1.63	0.42	No Evidence	No Evidence	No Evidence	No Evidence	No Evidence
ENSDARG00000089954	tdrd6	23.4129	23.1676	19.7578	22.1128	24.8578	23.8966	23.6085	24.121	24.2304	19.5435	24.3941	22.7226	4	4	0.74	2.01		0.11	0.61		-1.4	0.36	No Evidence	No Evidence	No Evidence	No Evidence	Detected
ENSDARG00000076155	mtpap	18.9655	18.7963	18.1371	18.633	20.061	22.9561	18.9328	20.65	19.6329	19.6645	18.0616	19.1197	2	2	0.76	2.02		0.34	0.49		-1.53	0.51	Detected	Detected	Detected	No Evidence	Detected
ENSDARG00000061735	hnrnpm	19.2678	18.9997	18.1243	18.7973	17.6276	26.4833	24.1384	22.7498	23.1515	21.3536	19.5975	21.3675	6	6	0.67	3.95		1.12	2.57		-1.38	0.19	Detected	Detected	Detected	Detected	Detected
ENSDARG00000029533	rpl18	30.7914	30.2719	30.0505	30.3713	29.4375	30.7068	29.6631	29.9358	31.7563	30.1904	32.0197	31.3221	8	8	0.41	-0.44		0.71	0.95		1.39	0.94	No Evidence	No Evidence	No Evidence	Detected	Detected
ENSDARG00000078429	vtg4	28.5458	26.9375	23.7884	26.4239	27.8058	28.1647	27.5258	27.8321	28.705	27.6352	28.7558	28.3653	51	1	0.43	1.41		0.6	1.94		0.53	0.58	No Evidence	No Evidence	No Evidence	No Evidence	Detected
ENSDARG00000076177	polr2a	19.2897	18.2711	18.1368	18.5659	18.609	19.7966	18.4603	18.9553	22.0436	18.3923	19.9667	20.1342	22	22	0.28	0.39		0.63	1.57		1.18	0.44	No Evidence	No Evidence	No Evidence	No Evidence	No Evidence
ENSDARG00000011597	atxn2l	19.2887	19.5694	19.9064	19.5882	23.2411	24.4085	19.7103	22.4533	23.5961	19.7733	22.7242	22.0312	4	4	0.94	2.87		0.98	2.44		-0.42	0.08	Detected	Detected	No Evidence	Detected	Detected
ENSDARG00000018914	hnrnpk	19.1756	19.3723	19.804	19.4506	19.5436	22.9288	23.4626	21.9783	18.71	18.2926	20.0123	19.005	2	2	0.95	2.53		0.33	-0.45		-2.97	1.05	Detected	Detected	Detected	Detected	Detected
ENSDARG00000060575	sec24c	19.9651	18.9635	20.6489	19.8592	17.4428	22.3009	18.8519	19.5319	18.9197	18.775	19.0775	18.9241	8	8	0.08	-0.33		0.88	-0.94		-0.61	0.16	No Evidence	No Evidence	No Evidence	No Evidence	No Evidence
ENSDARG00000092126	vtg5	27.0076	26.8056	18.9456	24.2529	25.5265	24.9603	24.206	24.8976	26.6623	26.3371	28.4629	27.1541	50	4	0.09	0.64		0.46	2.9		2.26	1.38	No Evidence	No Evidence	No Evidence	No Evidence	Detected
ENSDARG00000053439	ddx46	21.3599	18.1141	18.4462	19.3068	20.2512	18.7348	19.7409	19.5757	21.4206	20.1404	22.2391	21.2667	2	2	0.08	0.27		0.75	1.96		1.69	1.05	No Evidence	No Evidence	No Evidence	No Evidence	No Evidence
ENSDARG00000041811	rps25	19.8986	27.2512	26.8315	24.6604	27.1039	28.786	28.3368	28.0756	27.8615	26.2403	27.24	27.1139	5	5	0.63	3.42		0.43	2.45		-0.96	0.63	No Evidence	Detected	No Evidence	Detected	No Evidence
ENSDARG00000013307	rpl19	26.759	26.4176	26.9826	26.7198	27.6829	29.6792	28.2771	28.5464	28.7761	27.6621	28.4865	28.3082	3	3	1.39	1.83		1.89	1.59		-0.24	0.13	Detected	No Evidence	Detected	No Evidence	Detected
ENSDARG00000040344	h1m	19.645	25.0103	24.5206	23.0586	18.8583	25.0445	26.4494	23.4507	25.621	25.0092	24.8033	25.1445	4	4	0.05	0.39		0.53	2.09		1.69	0.29	No Evidence	No Evidence	No Evidence	No Evidence	No Evidence
ENSDARG00000045487	rps16	18.3033	19.0495	25.101	20.8179	19.7758	24.1803	19.5121	21.1561	19.8319	19.0181	19.367	19.4057	2	2	0.04	0.34		0.26	-1.41		-1.75	0.5	No Evidence	Detected	Detected	Detected	No Evidence
ENSDARG00000033770	vtg1	32.9754	32.5683	31.2089	32.2508	32.0328	31.4651	31.295	31.5977	32.5027	31.6847	33.3607	32.516	57	11	0.49	-0.65		0.14	0.27		0.92	0.8	No Evidence	No Evidence	No Evidence	No Evidence	No Evidence
ENSDARG00000055809	vtg2	30.2472	29.3849	27.6379	29.09	29.2647	29.3209	28.9456	29.177	30.0515	28.9144	30.7735	29.9131	38	28	0.04	0.09		0.37	0.82		0.74	0.59	No Evidence	No Evidence	No Evidence	No Evidence	Detected
ENSDARG00000020465	ewsr1b	19.2673	19.7367	18.9322	19.3121	18.5874	19.2587	19.8362	19.2274	24.1939	19.463	19.601	21.0859	3	3	0.07	-0.08		0.49	1.77		1.86	0.51	Detected	Detected	Detected	Detected	Detected
ENSDARG00000003599	rpl3	19.4126	18.1831	19.5785	19.0581	18.2486	25.6655	24.0992	22.6711	19.4692	19.3518	19.196	19.339	3	3	0.72	3.61		0.25	0.28		-3.33	0.67	No Evidence	No Evidence	Detected	Detected	Detected
ENSDARG00000014004	eif2b4	19.2555	18.6103	19.9814	19.2824	19.0089	22.1328	19.0708	20.0709	19.4287	19.6721	23.2876	20.7961	2	1	0.29	0.79		0.51	1.51		0.73	0.17	No Evidence	No Evidence	No Evidence	No Evidence	No Evidence
ENSDARG00000016889	eif3g	18.7376	19.4672	19.0749	19.0932	19.9488	23.6801	18.5166	20.7152	18.8059	18.524	18.0861	18.472	2	2	0.45	1.62		0.98	-0.62		-2.24	0.65	Detected	Detected	Detected	Detected	Detected
ENSDARG00000011408	lsm14ab	20.7891	19.3262	21.9225	20.6792	20.4578	26.0933	19.9861	22.179	18.3071	19.0789	19.554	18.98	4	2	0.29	1.5		0.95	-1.7		-3.2	0.73	No Evidence	No Evidence	No Evidence	No Evidence	No Evidence
ENSDARG00000003016	eef2b	19.5931	19.6763	19.3894	19.5529	22.5738	18.2806	23.0094	21.2879	19.0561	23.7862	18.3268	20.3897	2	2	0.5	1.74		0.19	0.84		-0.9	0.15	No Evidence	No Evidence	No Evidence	No Evidence	No Evidence
ENSDARG00000019230	rpl7a	30.5118	29.0765	28.4004	29.3296	30.4333	31.3524	30.9551	30.9136	31.3942	30.8205	31.766	31.3269	10	10	1.1	1.58		1.37	2		0.41	0.47	No Evidence	No Evidence	No Evidence	Detected	Detected
ENSDARG00000039641	rpl26	23.3148	24.2394	19.3979	22.3173	23.0626	27.0761	26.4775	25.5387	25.4317	23.7844	22.919	24.045	3	3	0.76	3.22		0.45	1.73		-1.49	0.44	No Evidence	No Evidence	No Evidence	No Evidence	No Evidence
ENSDARG00000003429	hnrpdl	19.0367	21.2304	18.3269	19.5313	22.115	18.9316	24.8279	21.9581	19.4174	18.3014	20.09	19.2696	3	2	0.56	2.43		0.09	-0.26		-2.69	0.69	Detected	Detected	Detected	Detected	Detected
ENSDARG00000031795	abcf1	19.1476	19.3323	19.8156	19.4318	19.0276	18.065	23.168	20.0869	18.9298	18.1472	19.4189	18.832	2	2	0.16	0.66		0.64	-0.6		-1.25	0.32	Detected	Detected	Detected	Detected	No Evidence
ENSDARG00000015829	mov10a	26.5392	26.6608	23.4475	25.5492	27.6727	28.4403	27.6998	27.9376	25.5143	25.6051	26.8195	25.9796	8	8	1.04	2.39		0.14	0.43		-1.96	1.79	Detected	Detected	Detected	Detected	Detected
ENSDARG00000037071	rps26	28.5867	28.6525	28.775	28.6714	29.3105	29.965	29.9404	29.7386	30.9815	30.1648	30.7482	30.6315	2	2	2.07	1.07		2.85	1.96	+	0.89	1.29	No Evidence	No Evidence	Detected	Detected	No Evidence
ENSDARG00000019778	rps6	25.4983	25.8781	19.4582	23.6116	27.4775	27.4035	27.4444	27.4418	27.977	27.6813	27.4019	27.6868	4	4	0.86	3.83		0.91	4.08	+	0.24	0.66	Detected	No Evidence	Detected	Detected	Detected
ENSDARG00000070265	h2afy	26.0017	26.388	24.1886	25.5261	26.0827	27.0919	28.1632	27.1126	26.7336	26.5265	28.6033	27.2878	5	3	0.81	1.59		0.87	1.76		0.18	0.07	No Evidence	No Evidence	No Evidence	No Evidence	No Evidence
ENSDARG00000034203	h2b	27.2042	27.9762	26.6459	27.2755	24.5678	26.772	27.4054	26.2484	26.1997	19.247	26.3467	23.9311	3	3	0.47	-1.03		0.64	-3.34		-2.32	0.39	No Evidence	No Evidence	No Evidence	No Evidence	No Evidence
ENSDARG00000029818	srsf5a	20.9316	19.1481	19.0789	19.7195	19.384	23.478	22.9083	21.9234	19.1391	18.4796	18.8703	18.8297	2	1	0.71	2.2		0.63	-0.89		-3.09	1.12	No Evidence	No Evidence	No Evidence	No Evidence	Detected
ENSDARG00000029394	ilf3b	19.1339	19.44	20.9205	19.8315	17.9778	25.1561	24.1404	22.4248	22.2192	20.3281	18.7077	20.4183	7	6	0.49	2.59		0.2	0.59		-2.01	0.34	No Evidence	No Evidence	No Evidence	No Evidence	No Evidence
ENSDARG00000017901	tln2a	18.9606	19.3014	19.8836	19.3819	18.495	18.1091	20.6102	19.0714	18.4257	19.0057	17.6545	18.362	13	11	0.14	-0.31		1.01	-1.02		-0.71	0.34	No Evidence	No Evidence	No Evidence	No Evidence	No Evidence
