# Supplementary material for: Genome wide analysis of 3′ UTR sequence elements and proteins regulating mRNA stability during maternal-to-zygotic transition in zebrafish
Source: HighWire-hosted journal article supplement (doi:10.1101/gr.245159.118), 2019-06-21
Supplement: Supplemental_Table_S5_JDedit.xlsx [file Supplemental_Table_S5_JDedit.xlsx]

## Sheet: Sheet1
Supplemental Table S5. Oligo sequences used for iCLIP experiments.
RBP	ENSEMBL Gene ID	Restriction sites	5' oligonucleotide	3' oligonucleotide
g3bp1	ENSDARG00000017741	BamHI-XbaI	aatggatccggactacaaggacgatgacGTGATGGAGAAGCCAAGTGCCCAG	aattctagaTCACTGACGTGGTCCTGTGTAGCG
rbm4.2	ENSDARG00000055080	BamHI-XbaI	aatggatccggactacaaggacgatgacGTTAAGATCTTTATTGGCAACCTATC	aattctagaTTAGTATGCGTATCGAACTCGCTC
tia1	ENSDARG00000052536	EcoRI-XbaI	aatgaattcggactacaaggacgatgacATGGACGACGAGCAGCCCAAGACC	aattctagaTCAGTGTGTGTGGTATCCTGCAGTG
org	ENSDARG00000076474	EcoRI-XhoI	aatgaattcggactacaaggacgatgacACTGACCAGTGCAACTACGCCG	aatctcgagTCACTGGGCCTCAGAGGGAACTAC
srsf4	ENSDARG00000027734	EcoRI-XhoI	aatgaattcggactacaaggacgatgacAGCGGTTGTCGTATTTTCATCGG	aatctcgagTCAATGGCGGCTGTCAGTGGATG
ddx5	ENSDARG00000038068	EcoRI-XhoI	aatgaattcggactacaaggacgatgacCCTGGATATTCTGACAGAGACCGC	aatctcgagTTACTGAGGGAACGCAGGAGGGG
zff9	ENSDARG00000045776	EcoRI-XhoI	aatgaattcggactacaaggacgatgacGACATGAGTACCAGTGAGTGTTTTG	aatctcgagCTACGCAGACGCTTCGATGCTGC
fubp1	ENSDARG00000029248	EcoRI-XhoI	aatgaattcggactacaaggacgatgacGCCGACTACTCTAACGTGGCTCCGC	aatctcgagTTACTGGCCCTGCTGAGCCTGGG
purb	ENSDARG00000068013	EcoRI-XhoI	aatgaattcggactacaaggacgatgacGCGGATGGAGACAGCGGGAGCGAG	aatctcgagTCAGTCGTCGTCCACATCCTCTC
cth1	ENSDARG00000057328	EcoRI-XhoI	aatgaattcggactacaaggacgatgacTTTGAGACCAGTCAAGACGACCTG	aatctcgagCTACAGCAGCGGTTTATCCAGGAC
khsrp	ENSDARG00000026489	EcoRI-XhoI	aatgaattccatggactacaaggacgatgacTCTGAGTACAGCGCGGTGCCGC	aatctcgagTCACTGCGCCTGCTGGCCCTGCGGTG
hnrnpc	ENSDARG00000053810	EcoRI-XhoI	aatgaattccatggactacaaggacgatgacGATCGTGCTTCGAGTGCAAGTC	aatctcgagTTACGAGTCGTCACCATTAATGCTATC
hnrnpa1	ENSDARG00000036675	EcoRI-XhoI	aatgaattccatggactacaaggacgatgacTCCAAAGAGGGCCAGCCACG	aatctcgagTTAAAACCGTCTACCGCCAGAGCCAC
ptbp2a	ENSDARG00000015230	EcoRI-XhoI	aatgaattccatggactacaaggacgatgacGACGGCATTGGTGACGTCGC	aatctcgagTCAGATGGTGGATTTGGAAAAGGAG
hnrnpa0a	ENSDARG00000089302	BamHI-EcoRI	aatggatcccatggactacaaggacgatgacACGGCTCAAATGGAAAACCAGC	aatgaattcTTAATACGAGCCTCCGTAACCCC
khdrbs1b	ENSDARG00000070475	EcoRI-XhoI	aatgaattccatggactacaaggacgatgacGAAAGCGAGAACAAATACC	aatctcgagTTAGTATCGTCCATAGGGGTGTTCC
khdrbs1a	ENSDARG00000052856	EcoRI-XhoI	aatgaattccatggactacaaggacgatgacGATCCCAACAGCAACAAGAGG	aatctcgagTCAGTATCGGCCATAAGGGTGTTC
celf1	ENSDARG00000005315	EcoRI-XhoI	aatgaattccatggactacaaggacgatgacGATAGTATCGAAGCTGAAGCCC	aatctcgagTCAGTATGGCTTGCTGTCATTTTTA
hrnpd	ENSDARG00000059246	EcoRI-XhoI	aatgaattccatggactacaaggacgatgacTCGGAGGAGCAGTTTCTGGGCG	aatctcgagTTAATACGGCTTGTAGCTGTTTTGATG
hug	ENSDARG00000016405	XhoI-XbaI	aatctcgagcatggactacaaggacgatgacCCGAATGGTTATGAGGACCCC	aattctagaTTACTTGTGAGATTTGCTGGATTTG
pcbp2	ENSDARG00000013184	EcoRI-XbaI	aatgaattccatggactacaaggacgatgacATGGACTCTGGAGTGATTGAAGGAGG	aattctagaTCAGTTAGCCGCCATTCCTGTCGCCTC
ythdf1	ENSDARG00000016447	EcoRI-XbaI	aatgaattccatggactacaaggacgatgacATGTCTACCACCAGTATTGACCCACAG	aattctagaCTATTGTTTATTTCGGTTCTGGCGTTC
hnrnpab	ENSDARG00000007960	EcoRI-XhoI	aatgaattccatggactacaaggacgatgacTCAGACGCCGAGCAGCAGTATA	aatctcgagTCAGTATGGCTTGTAGCTACTCTGG
